# Supplementary material for: Visible-light unmasking of heterocyclic quinone methide radicals from alkoxyamines
Source: Royal Society of Chemistry journal article supplement (doi:10.1039/c9cc08261a), 2019-01-01

# **Visible-light unmasking of heterocyclic quinone methide radicals from alkoxyamines**

Patrick Kielty,<sup>a</sup> Pau Farràs,<sup>a,b</sup> Patrick McArdle,<sup>a</sup> Dennis A. Smith<sup>a</sup> and Fawaz Aldabbagh<sup>\*,a,c</sup>

<sup>a</sup> School of Chemistry, National University of Ireland Galway, University Road, Galway, H91 TK33, Ireland

<sup>b</sup> Energy Research Centre, Ryan Institute, National University of Ireland Galway, University Road, Galway, H91 CF50, Ireland

<sup>c</sup> Department of Pharmacy, School of Life Sciences, Pharmacy and Chemistry, Kingston University, Penrhyn Road, Kingston upon Thames, KT1 2EE, U.K.

## **Supplementary Information**

## Contents

|                                                                                                                          |     |
|--------------------------------------------------------------------------------------------------------------------------|-----|
| Supporting Figures.....                                                                                                  | S3  |
| Supporting Tables .....                                                                                                  | S9  |
| Experimental .....                                                                                                       | S11 |
| Materials.....                                                                                                           | S11 |
| Measurements.....                                                                                                        | S11 |
| DFT calculations.....                                                                                                    | S11 |
| Melting points, ultraviolet-visible and infrared spectroscopy .....                                                      | S12 |
| Nuclear magnetic resonance (NMR spectroscopy) .....                                                                      | S12 |
| High resolution mass spectrometry (HRMS) .....                                                                           | S12 |
| Single crystal X-ray diffraction .....                                                                                   | S12 |
| Visible-light photoreactor.....                                                                                          | S13 |
| Analytical HPLC .....                                                                                                    | S13 |
| Homolysis rates ( $k_d$ ).....                                                                                           | S14 |
| Quantum yield of homolysis ( $\Phi_h$ ).....                                                                             | S14 |
| Cyclic voltammetry .....                                                                                                 | S14 |
| Synthetic Procedures and Characterization.....                                                                           | S15 |
| Synthesis of 4,7-dimethoxy-1-methyl-2-[(2,2,6,6-tetramethylpiperidin-1-yl)oxy]methyl}-1 <i>H</i> -benzimidazole (1)..... | S15 |
| General procedures (A-C) for the synthesis of benzimidazolequinones via dimethoxybenzimidazole oxidations .....          | S15 |
| References in Supplementary Information .....                                                                            | S20 |
| Appendix.....                                                                                                            | S21 |
| Tables Referenced in Supplementary Information.....                                                                      | S21 |
| NMR Spectra.....                                                                                                         | S23 |

## Supporting Figures

(A)

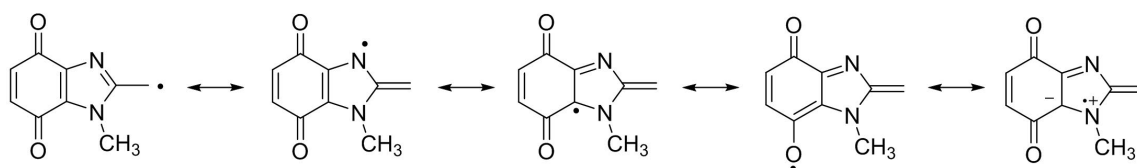

(B)

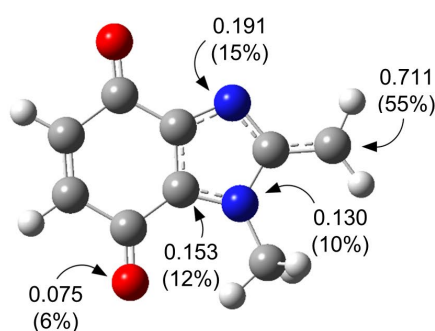

(C)

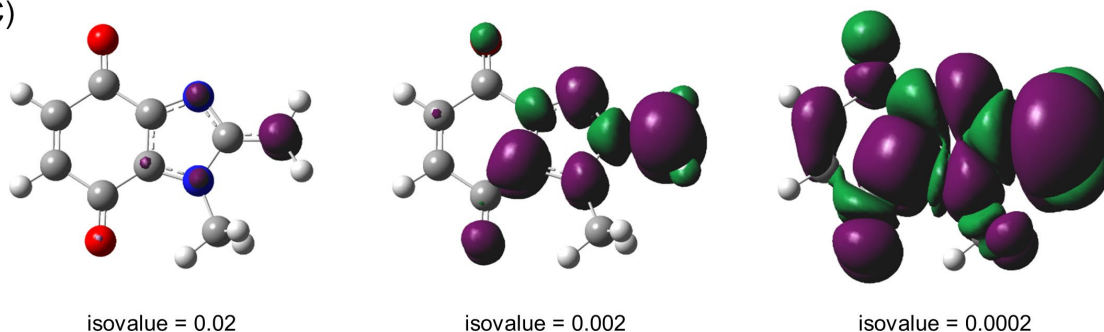

**Figure S1** (A) Resonance structures for **QM-rad**; (B) DFT-derived atomic NBO spin densities (the largest positive spin density ( $\alpha$ ) resides on the exocyclic C-atom (55%), as is typical of a benzylic-type system<sup>1</sup>); (C) Spin density distribution across **QM-rad** for three different isovalues with positive spin density appearing in purple and negative spin density in green. Isovalue = 0.002 appears in Scheme 1. Geometry optimization performed in the gas phase using UM06-2X/6-311++G (d,p), and NBO energy calculation performed using UM06-2X/cc-pVTZ.

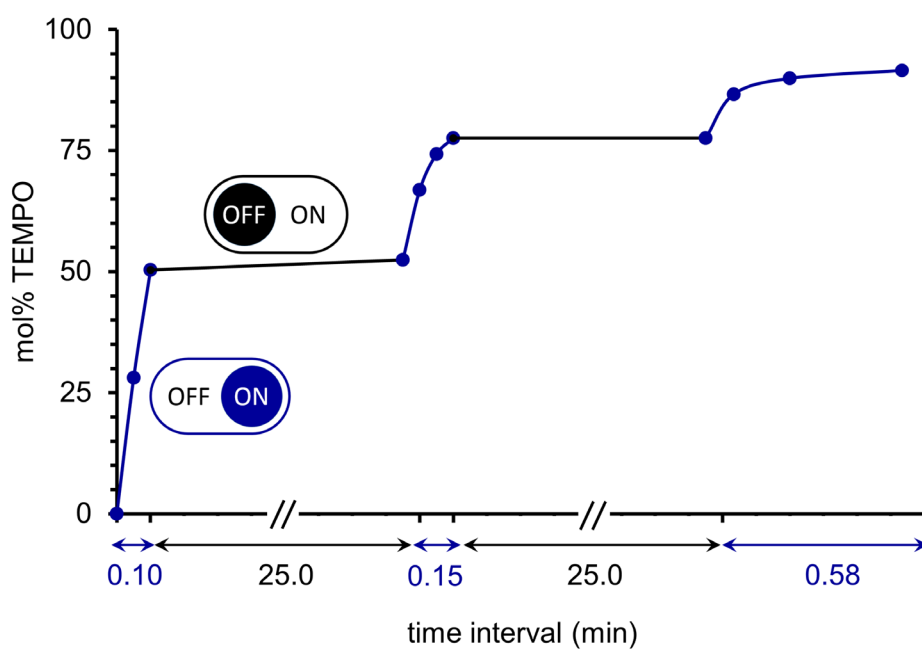

**Figure S2** On/off control in the blue LED-induced homolysis of **TEMPO-Vis**. Conditions: **TEMPO-Vis** (0.25 mM, DCE) illuminated by one blue LED bulb (9 W) under O<sub>2</sub> balloon, with HPLC analysis. Connecting lines drawn between data points.

(A)

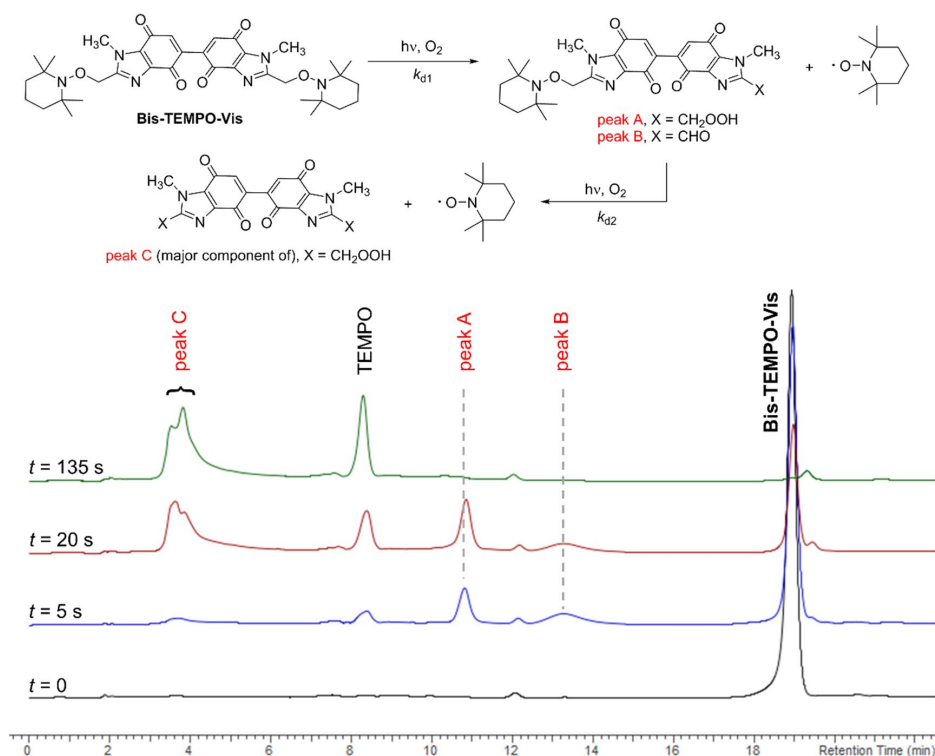

(B)

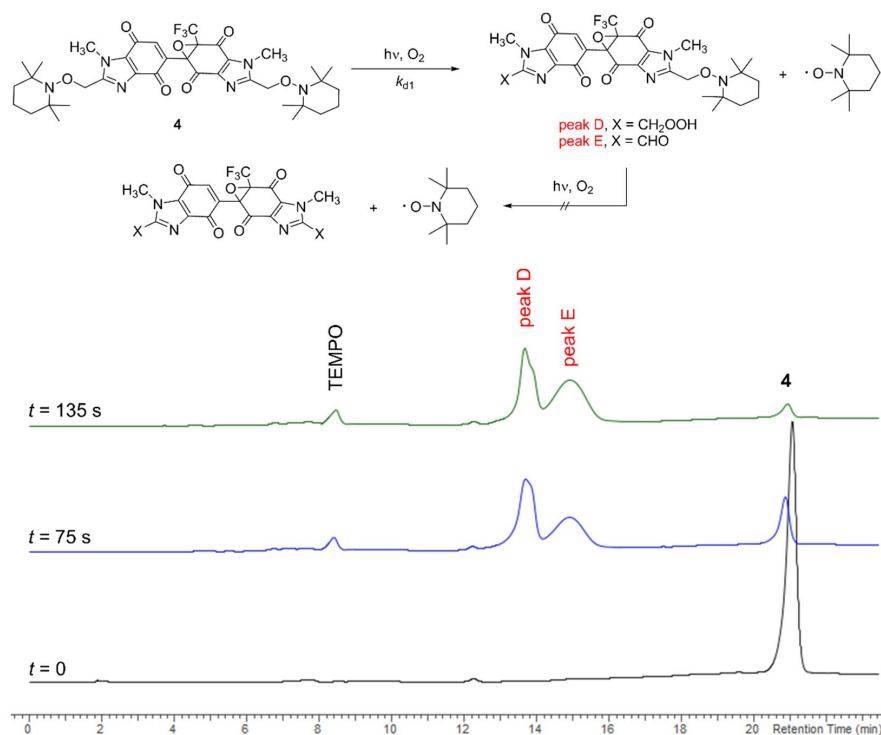

**Figure S3** HPLC-MS (ESI) monitoring of the blue LED homolysis of (A) **Bis-TEMPO-Vis** and (B) epoxide-quinone **4**. The [M + H]<sup>+</sup> adducts were detected and used to assign the structures corresponding to peaks A, B, D and E. The [M + Na + MeCN]<sup>+</sup> adduct was used to assign the major component of a complex mixture in peak C. The accuracy of all HRMS data was better than 5 ppm compared to the predicted masses.

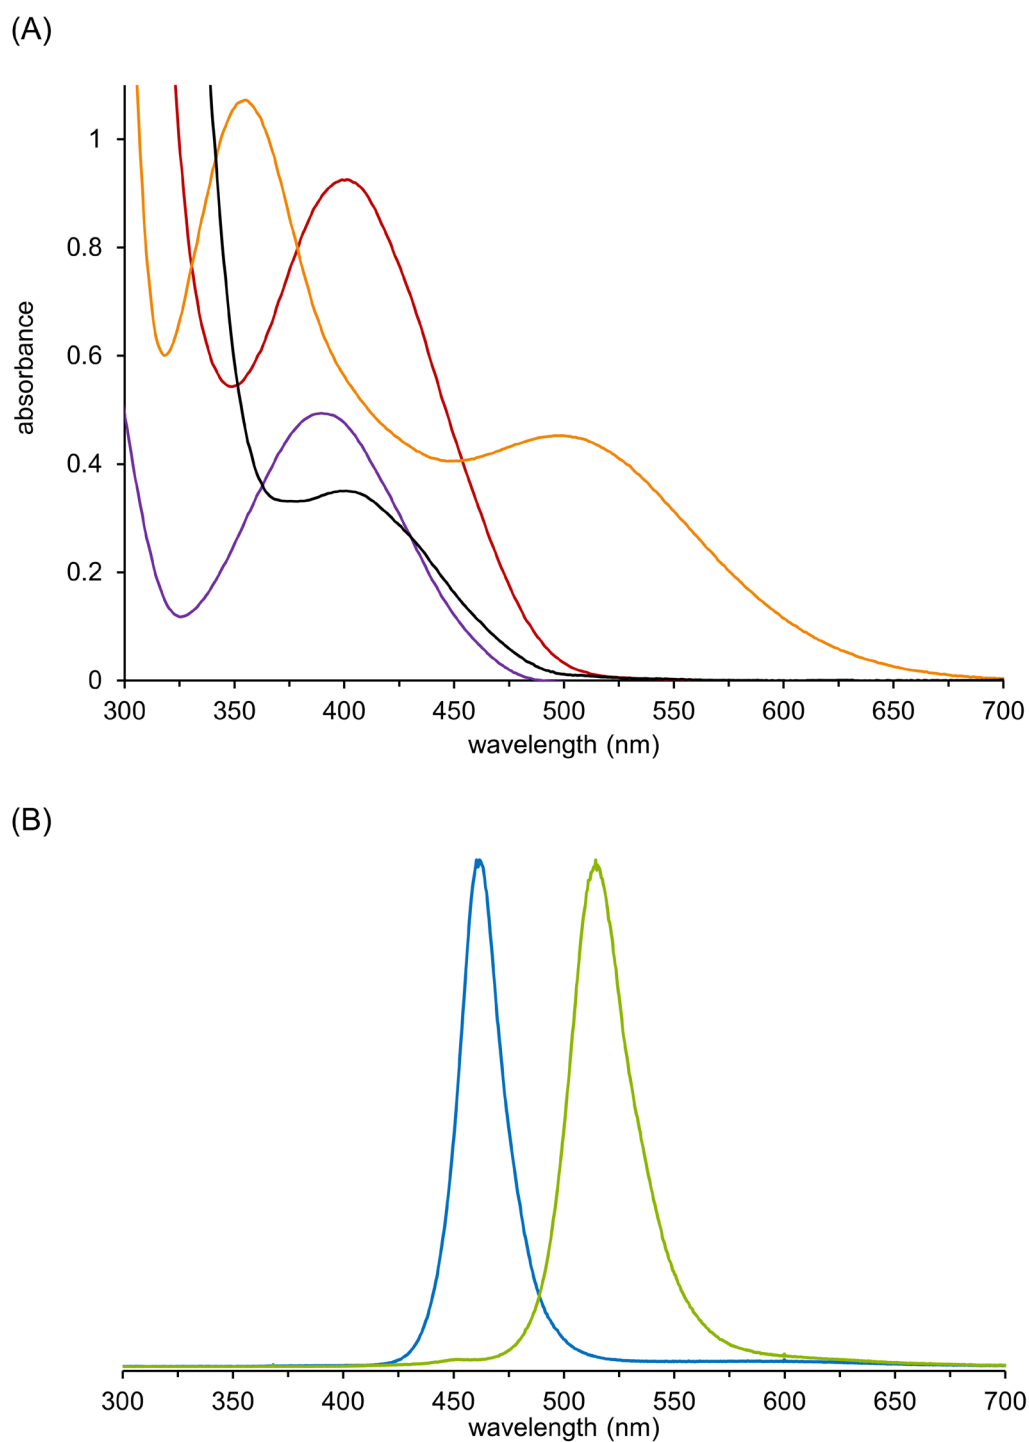

**Figure S4** (A) UV-visible light absorption spectra recorded in DCE (all  $3.75 \times 10^{-4}$  M) of **TEMPO-Vis** (purple), dimethoxybenzimidazole-benzimidazolequinone **2** (orange), **Bis-TEMPO-Vis** (red) and epoxide-quinone **4** (black). (B) Emission spectra for blue and green LEDs.

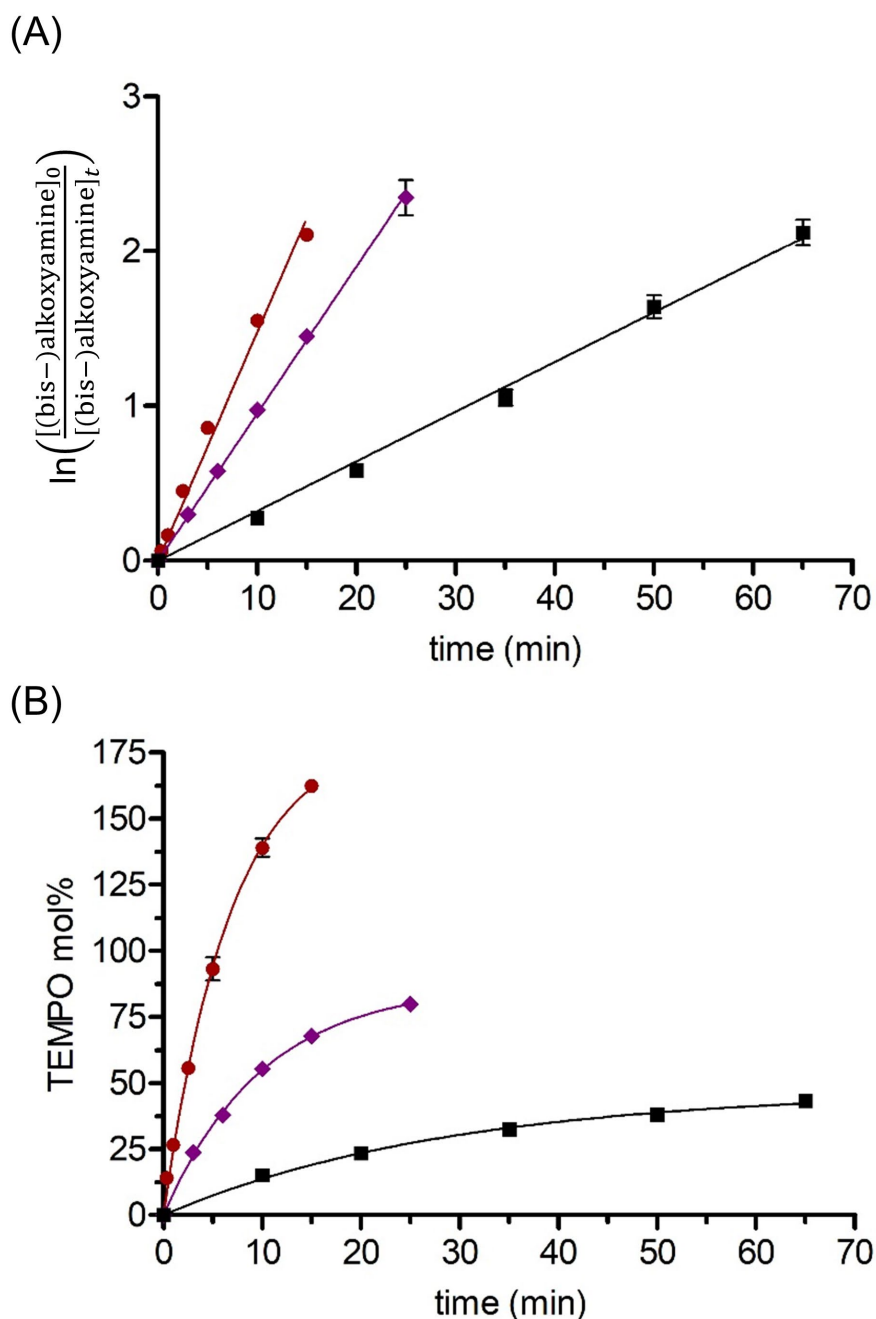

**Figure S5** Kinetics (at rt) of alkoxyamine and bis-alkoxyamine homolysis in green LED according to (A) (bis-)alkoxyamine decay and (B) TEMPO release. Eq 1 was fitted to the plots in (B) using GraphPad Prism software. Key: **TEMPO-Vis** (—◆—), **Bis-TEMPO-Vis** (—●—) and **4** (—■—). Conditions: alkoxyamine (0.25 mM, DCE) illuminated by two green LED bulbs (9 W each) under O<sub>2</sub> balloon, with HPLC analysis. Experiments performed in triplicate.

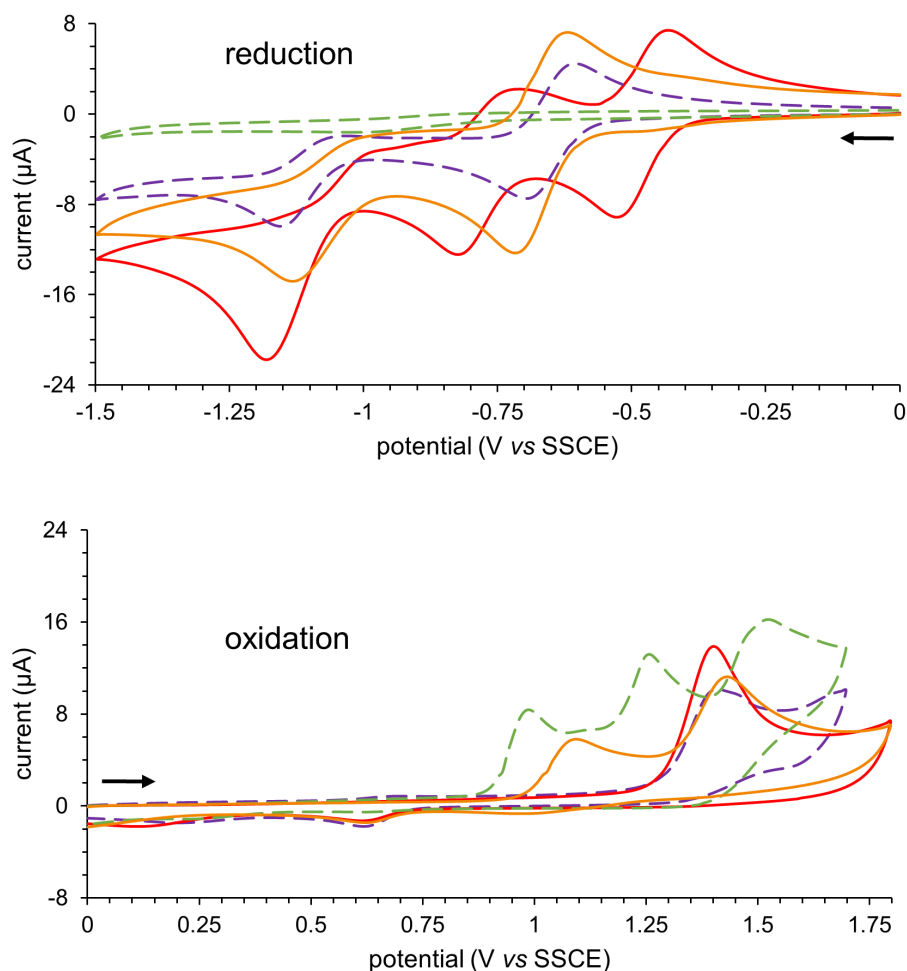

|                      | reduction          |                    |                     | oxidation             |              |
|----------------------|--------------------|--------------------|---------------------|-----------------------|--------------|
|                      | $Q_1/Q_1^{\cdot-}$ | $Q_2/Q_2^{\cdot-}$ | $Q^{\cdot-}/Q^{2-}$ | DMB/DMB <sup>ox</sup> | $Q/Q^{ox}$   |
| <b>2</b>             | -0.67              | -                  | -1.13 (irrev)       | 1.09 (irrev)          | 1.43 (irrev) |
| <b>TEMPO-Vis</b>     | -0.65              | -                  | -1.16 (irrev)       | -                     | 1.41 (irrev) |
| <b>1</b>             | -                  | -                  | -                   | 0.99 (irrev)          | -            |
| <b>Bis-TEMPO-Vis</b> | -0.48              | -0.77              | -1.18 (irrev)       | -                     | 1.40 (irrev) |

**Figure S6** Cyclic voltammetry of **Bis-TEMPO-Vis** (—), **TEMPO-Vis** (---), **2** (—) and **1** (---) with associated table of redox potentials (all in V). The first reduction of **2** correlates with the first quinone reduction ( $Q_1/Q_1^{\cdot-}$ ) of **TEMPO-Vis**, indicating that the LUMO of **2** lies on the quinone motif. The first oxidation of **2** correlates well with the first oxidation of dimethoxybenzimidazole (DMB/DMB<sup>ox</sup>) **1**, indicating that the HOMO of **2** lies on the dimethoxybenzimidazole motif. For **Bis-TEMPO-Vis**, the two quinone moieties are electronically coupled resulting in two consecutive *one-electron* reductions ( $Q_1/Q_1^{\cdot-} = -0.48$  V and  $Q_2/Q_2^{\cdot-} = -0.77$  V), and a further *two-electron* reduction at  $-1.18$  V correlated to the second ( $Q^{\cdot-}/Q^{2-}$ ) one-electron reduction of **TEMPO-Vis**. The first oxidation of **Bis-TEMPO-Vis** correlates with the equivalent process in **TEMPO-Vis**. Scan rate of 0.1 V/s, alkoxyamine (1 mM), anhydrous DCE (with Bu<sub>4</sub>NPF<sub>6</sub> as electrolyte, 0.2 M), arrow indicates direction of scan.



## Supporting Tables

**Table S1** DFT-derived bond lengths in the benzimidazolequinone core of **TEMPO-Vis** and **QM-rad**<sup>a</sup>

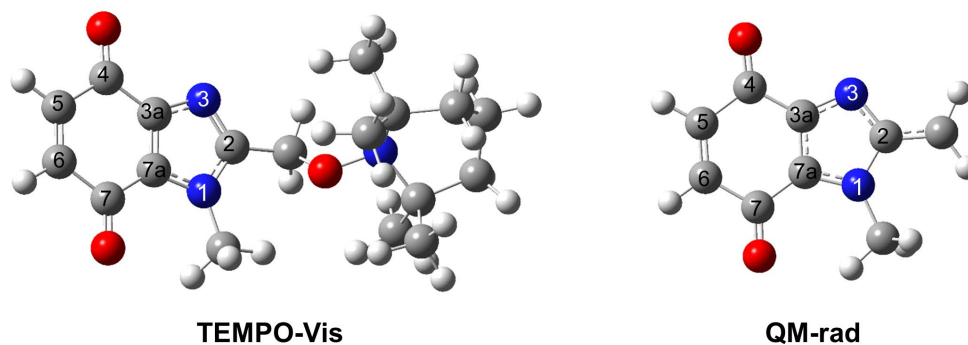

| bond               | TEMPO-Vis length (Å) | QM-rad length (Å) |
|--------------------|----------------------|-------------------|
| 1N—CH <sub>3</sub> | 1.459                | 1.456             |
| 1N—2C              | 1.366                | 1.388             |
| 1N—7aC             | 1.366                | 1.361             |
| 2C—CH <sub>2</sub> | 1.493                | 1.389             |
| 2C—3N              | 1.319                | 1.354             |
| 3N—3aC             | 1.359                | 1.333             |
| 3aC—4C             | 1.475                | 1.483             |
| 3aC—7aC            | 1.377                | 1.395             |
| 4C—O               | 1.206                | 1.205             |
| 4C—5C              | 1.504                | 1.499             |
| 5C—6C              | 1.336                | 1.336             |
| 6C—7C              | 1.495                | 1.496             |
| 7C—O               | 1.213                | 1.216             |
| 7C—7aC             | 1.462                | 1.458             |

<sup>a</sup>DFT geometry optimization performed in the gas phase using M06-2X (for **TEMPO-Vis**) or UM06-2X (for **QM-rad**) and 6-311++G (d,p), specifying singlet multiplicity for **TEMPO-Vis** and doublet multiplicity for **QM-rad**.

**Table S2** Quantum yields of homolysis ( $\Phi_h$ )<sup>a</sup>

|                      | LED color | $\Phi_h$ (%) <sup>b</sup> |
|----------------------|-----------|---------------------------|
| <b>TEMPO-Vis</b>     | blue      | 6.19                      |
| <b>Bis-TEMPO-Vis</b> | blue      | 2.56                      |
| <b>4</b>             | blue      | 1.17                      |
| <b>2</b>             | blue      | 0.003                     |
| <b>TEMPO-Vis</b>     | green     | 0.047                     |
| <b>Bis-TEMPO-Vis</b> | green     | 0.074                     |
| <b>4</b>             | green     | 0.016                     |
| <b>2</b>             | green     | < 0.0001                  |

<sup>a</sup>Homolysis performed according to Table 2 conditions using blue LED (1 × 9 W) or green LED (2 × 9 W) bulbs. <sup>b</sup>Calculated from the number of alkoxyamine molecules consumed during the half-life ( $t_{1/2}$ ) of decay and the total number of available photons (see equation S1 below). Low  $\Phi_h$  are reported in other visible-light photolysis.<sup>2,3</sup>

## Experimental

### Materials

2-(Chloromethyl)-4,7-dimethoxy-1-methyl-1*H*-benzimidazole was prepared from (4,7-dimethoxy-1*H*-benzimidazol-2-yl)methanol<sup>4,5</sup> using NaH (Sigma-Aldrich, 60% dispersion in mineral oil) and MeI (Sigma-Aldrich, > 99%) in THF for *N*-methylation, followed by treatment with SOCl<sub>2</sub> (Sigma-Aldrich, 97%) in CH<sub>2</sub>Cl<sub>2</sub> (Fischer Scientific, ≥ 99%) for chlorination. (2,2,6,6-Tetramethylpiperidin-1-yl)oxyl (TEMPO, Sigma-Aldrich, 98%), H<sub>2</sub> (BOC, 99.99%), PtO<sub>2</sub> (Sigma-Aldrich), MgSO<sub>4</sub> (Alfa Aesar, 99.5%), Na<sub>2</sub>CO<sub>3</sub> (ACROS Organics, 99.5%), *N*-bromosuccinimide (NBS, Lancaster, 99%), H<sub>2</sub>SO<sub>4</sub> (BDH, 98%), [bis(trifluoroacetoxy)iodo]benzene (PIFA, Sigma-Aldrich, 97%), MeCN (Sigma-Aldrich, HPLC Plus, ≥ 99.9%), cerium(IV) ammonium nitrate (CAN, Fischer Scientific, 99%), *t*BuOOH (ACROS Organics, 70% in H<sub>2</sub>O), sodium trifluoromethanesulfinate (Langlois reagent, TCI, > 95%), Ar (BOC, 99.8%), Cu(OTf)<sub>2</sub> (Sigma-Aldrich, 98%), 1,2-dichloroethane (DCE, Sigma-Aldrich, anhydrous, 99.8%), Bu<sub>4</sub>NPF<sub>6</sub> (Sigma-Aldrich, for electrochemical analysis, ≥ 99%), EtOAc (Fischer Scientific, ≥ 99%) and hexanes (Fischer Scientific, bp 40–60 °C) were used as received. THF (Sigma-Aldrich, CHROMASOLV® Plus ≥ 99.9%) and Et<sub>2</sub>O (Sigma-Aldrich, > 99.5%) were dried and distilled over Na (Sigma-Aldrich, > 99.8%) and benzophenone (ACROS Organics, 99%). CDCl<sub>3</sub> (Sigma-Aldrich, 99.8% atom D + 0.03% Si(CH<sub>3</sub>)<sub>4</sub> v/v) and CD<sub>2</sub>Cl<sub>2</sub> (Eurisotop, 99.9% atom D) were used as received. Thin layer chromatography (TLC) was performed on Merck TLC silica gel 60 F<sub>254</sub> plates using a UV lamp (254 nm) for visualization. Flash chromatography was performed using silica gel, pore size 60 Å, 230–400 mesh, and particle size 40–63 µm. Dry column vacuum chromatography (with Apollo Scientific silica gel ZEOprep 60 and 15–35 µm particle size),<sup>6</sup> was preferable for purification of light-active compounds, due to the convenience of light exclusion by covering the apparatus with Al-foil during elution.

### Measurements

**DFT calculations:** Geometry optimizations were performed using Gaussian 16,<sup>7</sup> installed at the Irish Centre for High-End Computing (ICHEC), using an M06-2X functional<sup>8</sup> with a 6-311++G (d,p) basis set. All structures were fully optimized in the gas phase and verified as local minima through frequency calculations. The unrestricted formalism, UM06-2X, was specified for all radical models. The natural bond orbital (NBO) energy calculation on **QM-**

**rad** was performed using M06-2X with a cc-pVTZ basis set. TD-DFT was performed at the same level of theory as the geometry optimization, with 1,2-dichloroethane (DCE) as solvent using the polarizable continuum model (PCM).<sup>9</sup> Natural transition orbitals (NTOs) provided graphical representation of the ground and excited states.<sup>10</sup> Bond dissociation energies (BDEs) were calculated based on the free energy difference between the starting alkoxyamines and the radical products (thermal free energy correction was added). The lowest triplet energies ( $E_T$ ) of starting alkoxyamines are given relative to the optimized singlet ground state ( $S_0$ ) energies. Model energies are reported in Table A1 of the appendix.

**Melting points, ultraviolet-visible and infrared spectroscopy:** Melting points were measured on a Stuart Scientific melting point apparatus SMP3. Ultraviolet-visible (UV-vis) spectra were recorded using a Varian (Cary 100) UV-vis spectrometer. Infrared spectra were recorded using a Perkin-Elmer Spec 1 with ATR attached.

**Nuclear magnetic resonance (NMR spectroscopy):** NMR spectra were recorded using a JEOL ECX 400 MHz or a Varian 500 or 600 MHz instrument (the specific NMR frequency used is detailed in the characterization section and on spectra). The chemical shifts were in ppm relative to  $\text{Si}(\text{CH}_3)_4$  for recorded spectra in  $\text{CDCl}_3$ , and relative to  $\text{CH}_2\text{Cl}_2$  at 5.32 ppm for  $^1\text{H}$  NMR and 53.84 ppm for  $^{13}\text{C}$  NMR spectra recorded in  $\text{CD}_2\text{Cl}_2$ .  $^{13}\text{C}$  NMR data were collected at 100, 125 or 150 MHz with complete proton decoupling. NMR assignments were supported by DEPT and  $^1\text{H}$ - $^1\text{H}$  (COSY) and  $^1\text{H}$ - $^{13}\text{C}$  single bond correlation (HSQC). Multiple bond correlation of  $^1\text{H}$ - $^{13}\text{C}$  (HMBC) was used to characterize the aromatic CHs in benzimidazolequinone-dimethoxybenzimidazoles **2** and **3**, with through-space correlation (ROESY) supplementing the CH characterization in trifluoromethylquinone **3**.  $^{19}\text{F}$  NMR data were collected at 470 MHz.

**High resolution mass spectrometry (HRMS):** HRMS was carried out using ESI time-of-flight mass spectrometer (TOFMS) in positive mode using a Waters LCT Mass Spectrometry instrument. The precision of all accurate mass measurements was better than 5 ppm.

**Single crystal X-ray diffraction:** Single crystal data was collected using an Oxford Diffraction Xcalibur system operated using the CrysAlisPro software. The crystal structure was solved using ShelxT version 2014/55,<sup>11</sup> and refined using ShelxL version 2017/1,<sup>12</sup> both of which were operated within the Oscale software package.<sup>13</sup> Crystallographic data for **Bis-TEMPO-Vis** has been deposited with the Cambridge Crystallographic Data Centre with deposit number CCDC-1948448. This data is available free of charge via

[www.ccdc.cam.ac.uk/data\\_request/cif](http://www.ccdc.cam.ac.uk/data_request/cif) (or from the Cambridge Crystallographic Data Centre, 12 Union Road, Cambridge CB2 1EZ, U.K.; fax +44 1223 336033; or e-mail [deposit@ccdc.cam.ac.uk](mailto:deposit@ccdc.cam.ac.uk)). Single crystal X-ray data and structure refinements are reported in Table A2 of the appendix.

**Visible-light photoreactor:** The reactor used blue ( $1 \times 9$  W) or green ( $2 \times 9$  W) LED bulb(s) placed inside an aluminium container of diameter 10 cm (below). A vial (1.5 mL capacity for homolysis kinetics experiments, Table 2) with a solution of alkoxyamine was placed in the centre of the reactor opposite the bulb. The bulb was air cooled using a 2.5 W fan, which ensured that the interior reactor temperature remained at ambient temperature. The emission spectra of the LEDs were narrow and confined to the visible region (Figure S4B).

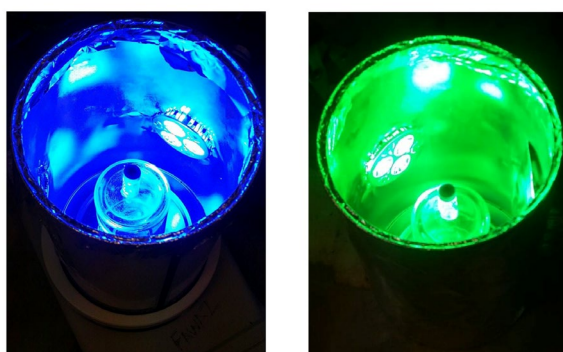

**Analytical HPLC:** The Agilent 1100 Series HPLC was equipped with a UV detector operating at 254 nm and a Phenomenex® BondClone™ 10  $\mu$ m C18, 250  $\times$  4.6 mm column. The sample was injected via automatic injector (see table below for injection volume). The flow rate of the mobile phase was 1 mL/min, and the composition depended on the experiment being performed (see below). Calibration curves were generated for [TEMPO] and [alkoxyamine] for the construction of rate plots, and for the determination of  $k_d$ .

| homolysis experiment       | injection volume ( $\mu$ L) | mobile phase program (%MeCN in H <sub>2</sub> O)                                   |
|----------------------------|-----------------------------|------------------------------------------------------------------------------------|
| <b>TEMPO-Vis</b>           | 5                           | time 0 = 45, 11.5 min = 45, 15 min = 75, 19.5 min = 75, 19.6 min = 45, 22 min = 45 |
| <b>Bis-TEMPO-Vis and 4</b> | 10                          | time 0 = 45, 15 min = 95, 19 min = 95, 19.5 min = 45, 23 min = 45                  |
| <b>2</b>                   | 5                           | time 0 = 45, 11.5 min = 45, 15 min = 95, 27 min = 95, 27.1 min = 45, 30 min = 45   |

**Homolysis rates ( $k_d$ ):** A solution of alkoxyamine in DCE (1 mL, 0.25 mM) in a 1.5 mL clear glass vial was prepared in the absence of light. A sample was taken and analyzed by HPLC (representing time 0). The solution was subjected to either one blue (9 W) LED bulb or two green (9 W) LED bulbs under an O<sub>2</sub> balloon for a period of time. A sample was taken and [TEMPO] and [alkoxyamine] were measured by HPLC. During the run, the remainder of the solution was placed in the dark, which stopped the reaction, as evidenced by the on/off experiment (Figure S2). Illumination of the solution was resumed, with continued sampling over time. Experiments were performed in triplicate. Rate constants ( $k_d$ ) were derived using two equivalent methods: (1) using the first-order plot describing the decay of [alkoxyamine] over time and (2) using the growth of [TEMPO] and fitting eq 1 using the method of least squares within GraphPad Prism® software.

**Quantum yield of homolysis ( $\Phi_h$ ):** The  $\Phi_h$  was measured according to eq S1. The number of molecules converted was calculated based on the  $t_{1/2}$  of the alkoxyamine starting material measured by alkoxyamine decay (Table 2). The number of incident photons was measured using a Wavetek DM15XL multimeter connected to a calibrated Thorlabs FDS1010 Si photodiode (1 cm<sup>2</sup>), and was calculated based on the total light intensity falling on the surface of the reaction vessel from two directions: one direction measuring light emanating directly from the bulb, and the other direction being 180° opposite, accounting for any reflection from the photoreactor interior.

$$\Phi_h = 100 \times \frac{\text{number of molecules converted}}{\text{number of incident photons}} \quad (\text{S1})$$

**Cyclic voltammetry:** Cyclic voltammograms were recorded using a PalmSens3+ potentiostat equipped with a glassy carbon and Pt-wire electrode, using a sodium-saturated calomel electrode (SSCE) as reference. Cycles were performed on alkoxyamines (1 mM) at a scan rate of 0.1 V/s in anhydrous DCE using Bu<sub>4</sub>NPF<sub>6</sub> (0.2 M) as supporting electrolyte.

## Synthetic Procedures and Characterization

### Synthesis of 4,7-dimethoxy-1-methyl-2-[(2,2,6,6-tetramethylpiperidin-1-yl)oxy]methyl}-1*H*-benzimidazole (**1**)

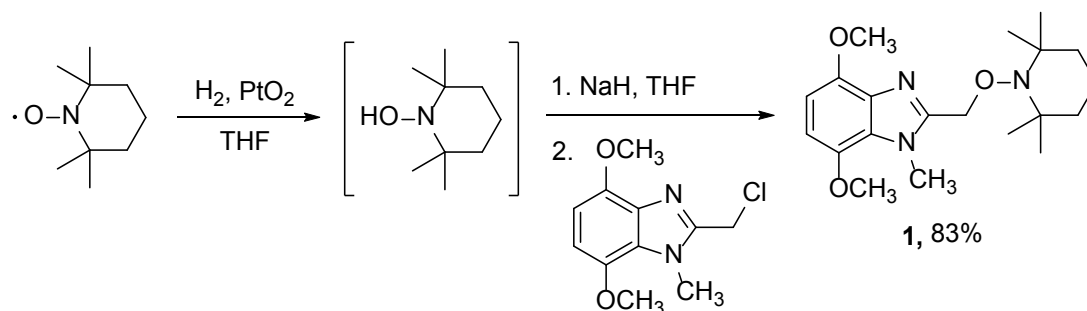

TEMPO (0.972 g, 6.23 mmol) and  $\text{PtO}_2$  (28 mg, 0.12 mmol) in THF (15 mL) were stirred under a balloon of  $\text{H}_2$  at rt, until the mixture turned colourless ( $\sim 2$  h).<sup>14</sup> The mixture was filtered, NaH (83 mg, 2.08 mmol, 60%) added, and stirred at rt for 1 h. 2-(Chloromethyl)-4,7-dimethoxy-1-methyl-1*H*-benzimidazole (0.50 g, 2.08 mmol) was added, and the stirring continued at reflux for 16 h.  $\text{H}_2\text{O}$  (50 mL) was added, and the solution extracted using  $\text{CH}_2\text{Cl}_2$  ( $3 \times 40$  mL). The combined organic layers were dried ( $\text{MgSO}_4$ ), evaporated, and the residue purified by flash chromatography using EtOAc and hexanes as eluent to give **1** (0.625 g, 83%) as a white solid; mp 114–116 °C;  $R_f$  0.40 (2 : 3 EtOAc : hexanes);  $\nu_{\text{max}}$  (neat,  $\text{cm}^{-1}$ ) 2976, 2928, 1524, 1461, 1394, 1334, 1262, 1234, 1146, 1100, 1069, 1027;  $\delta_{\text{H}}$  (400 MHz,  $\text{CDCl}_3$ ) 1.05 (6H, s), 1.25 (6H, s), 1.29–1.31 (1H, m), 1.44–1.50 (5H, m), 3.85 (3H, s), 3.92 (3H, s), 4.11 (3H, s,  $\text{NCH}_3$ ), 5.02 (2H, s), 6.45 (1H, d,  $J = 8.5$  Hz), 6.52 (1H, d,  $J = 8.5$  Hz);  $\delta_{\text{C}}$  (100 MHz,  $\text{CDCl}_3$ ) 17.1 ( $\text{CH}_2$ ), 20.1 ( $\text{CH}_3$ ), 33.1 ( $\text{NCH}_3$ ), 33.5 ( $\text{CH}_3$ ), 39.8 ( $\text{CH}_2$ ), 55.8, 56.0 (both  $\text{OCH}_3$ ), 60.1 (C), 72.0 ( $\text{CH}_2$ ), 101.0, 103.3 (both CH), 126.9, 134.4, 141.8, 146.2, 149.8 (all C); HRMS (ESI)  $m/z$   $[\text{M} + \text{H}]^+$ ,  $\text{C}_{20}\text{H}_{32}\text{N}_3\text{O}_3$  calcd. 362.2444, observed 362.2444.

### General procedures (A-C) for the synthesis of benzimidazolequinones via dimethoxybenzimidazole oxidations

**Procedure A:** *N*-Bromosuccinimide (NBS, 39 mg, 0.22 mmol) was added to dimethoxybenzimidazole **1** (72 mg, 0.20 mmol),  $\text{H}_2\text{SO}_4$  (18  $\mu\text{L}$ , 0.34 mmol) and THF/ $\text{H}_2\text{O}$  (6 mL, 2/1) at rt, and stirred for 10 min in the absence of light. Aq  $\text{Na}_2\text{CO}_3$  (10 mL, sat.) was added, and the solution was extracted with  $\text{CH}_2\text{Cl}_2$  ( $2 \times 20$  mL). The combined organic layers

were dried (MgSO<sub>4</sub>), evaporated, and the residue purified by dry column vacuum chromatography with EtOAc and hexanes as eluent.

**Procedure B:** Bis[(trifluoroacetoxy)iodo]benzene (PIFA, 0.129 g, 0.30 mmol) in MeCN/H<sub>2</sub>O (2 mL, 2/1) was added dropwise to dimethoxybenzimidazole **1** (72 mg, 0.20 mmol) in MeCN/H<sub>2</sub>O (2 mL, 2/1) at rt, and stirred for 3 h in the absence of light. H<sub>2</sub>O (10 mL) was added, and the solution extracted with CH<sub>2</sub>Cl<sub>2</sub> (3 × 15 mL). The combined organic layers were dried (MgSO<sub>4</sub>), evaporated, and the residue purified by dry column vacuum chromatography with EtOAc and hexanes as eluent.

**Procedure C:** Cerium(IV) ammonium nitrate (CAN, X mmol, see Table 1) in H<sub>2</sub>O (5 mL) was added dropwise to dimethoxybenzimidazole **1** (72 mg, 0.20 mmol) in MeCN (5 mL) at 0 °C, and stirred for 20 min in the absence of light. H<sub>2</sub>O (10 mL) was added, and the solution extracted with CH<sub>2</sub>Cl<sub>2</sub> (3 × 15 mL). The combined organic layers were dried (MgSO<sub>4</sub>), evaporated, and the residue purified by dry column vacuum chromatography with EtOAc (or Et<sub>2</sub>O) and hexanes as eluent.

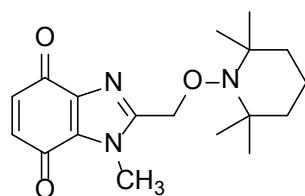

**TEMPO-Vis**

**1-Methyl-2-([(2,2,6,6-tetramethylpiperidin-1-yl)oxy]methyl)-1H-benzimidazole-4,7-dione (TEMPO-Vis)**, according to Procedure B: 52 mg, 78%; yellow solid; mp 131–132 °C; *R*<sub>f</sub> 0.50 (2: 3 EtOAc : hexanes);  $\lambda_{\text{max}}$  (DCE, nm) 389 ( $\epsilon = 1.32 \times 10^3$ );  $\nu_{\text{max}}$  (neat, cm<sup>-1</sup>) 2974, 2931, 1661 (C=O), 1591, 1515, 1478, 1375, 1361, 1347, 1336, 1276, 1202, 1132;  $\delta_{\text{H}}$  (500 MHz, CDCl<sub>3</sub>) 1.09 (6H, s, CH<sub>3</sub>), 1.25 (6H, s, CH<sub>3</sub>), 1.34–1.36 (2H, m), 1.48–1.51 (4H, m), 4.09 (3H, s), 5.02 (2H, s), 6.62 (1H, d, *J* = 10.5 Hz), 6.69 (1H, d, *J* = 10.5 Hz);  $\delta_{\text{C}}$  (100 MHz, CDCl<sub>3</sub>) 17.0 (CH<sub>2</sub>), 20.2, 32.9, 33.3 (all CH<sub>3</sub>), 39.8 (CH<sub>2</sub>), 60.3 (C), 70.9 (CH<sub>2</sub>), 131.5 (C), 136.3, 136.6 (both CH), 141.0, 151.4 (both C), 178.8, 181.1 (both C=O); HRMS (ESI) *m/z* [M + H]<sup>+</sup>, C<sub>18</sub>H<sub>26</sub>N<sub>3</sub>O<sub>3</sub> calcd. 332.1974, observed 332.1971.



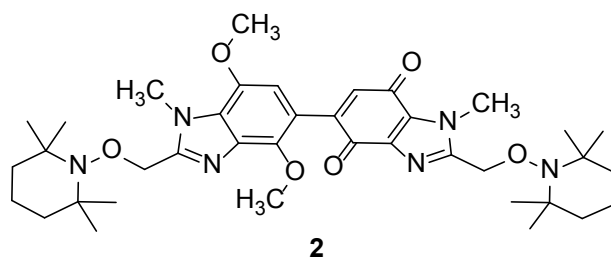

**4',7'-Dimethoxy-1,1'-dimethyl-2,2'-bis{[(2,2,6,6-tetramethylpiperidin-1-yl)oxy]methyl}-1H,1'H-[5,5'-bibenzimidazole]-4,7-dione (2)**, according to Procedure C using CAN (0.219 g, 0.40 mmol): 0.119 g, 86%; deep red solid; mp 127–129 °C;  $R_f$  0.25 (1 : 1 EtOAc : hexanes);  $\lambda_{\max}$  (DCE, nm) 497 ( $\epsilon = 1.20 \times 10^3$ ), 355 ( $\epsilon = 2.87 \times 10^3$ );  $\nu_{\max}$  (neat,  $\text{cm}^{-1}$ ) 2972, 2930, 1653 (C=O), 1532, 1463, 1277, 1150, 1103, 1037;  $\delta_{\text{H}}$  (400 MHz,  $\text{CDCl}_3$ ) 1.05–1.06 (12H, m,  $\text{CH}_3$ ), 1.23 (12H, s,  $\text{CH}_3$ ), 1.29–1.32 (2H, m), 1.45–1.50 (10H, m), 3.86 (3H, s,  $\text{OCH}_3$ ), 4.08 (3H, s,  $\text{NCH}_3$ ), 4.09 (3H, s,  $\text{NCH}_3$ ), 4.15 (3H, s,  $\text{OCH}_3$ ), 5.00 (2H, s), 5.01 (2H, s), 6.43 (1H, s, C6'-H), 6.66 (1H, s, C6-H);  $\delta_{\text{C}}$  (100 MHz,  $\text{CDCl}_3$ ) 17.0, 17.1 (both  $\text{CH}_2$ ), 20.2 ( $\text{CH}_3$ ), 32.9, 33.1 (both  $\text{NCH}_3$ ), 33.3, 33.4 (both  $\text{CH}_3$ ), 39.8 ( $\text{CH}_2$ ), 56.0 ( $\text{OCH}_3$ ), 60.1, 60.3 (C), 61.5 ( $\text{OCH}_3$ ), 71.0, 72.0 (both  $\text{CH}_2$ ), 105.4 (C6'-H), 116.8, 128.7, 131.5 (all C), 134.3 (C6-H), 136.4, 141.3, 142.7, 144.3, 147.0, 150.5, 151.1 (all C), 179.0, 180.1 (both C=O); HRMS (ESI)  $m/z$   $[\text{M} + \text{H}]^+$ ,  $\text{C}_{38}\text{H}_{55}\text{N}_6\text{O}_6$  calcd. 691.4183, observed 691.4183.

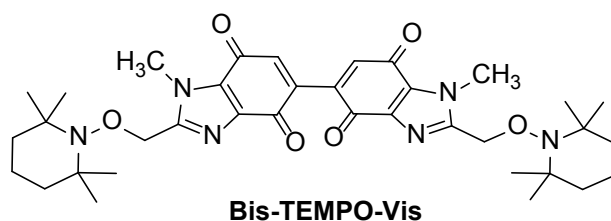

**1,1'-Dimethyl-2,2'-bis{[(2,2,6,6-tetramethylpiperidin-1-yl)oxy]methyl}-1H,1'H-5,5'-bibenzimidazole-4,4',7,7'-tetrone (Bis-TEMPO-Vis)**, according to Procedure C using CAN (0.350 g, 0.64 mmol): 0.108 g, 82%; yellow solid; mp 228–231 °C (deg);  $R_f$  0.28 (19 : 1  $\text{Et}_2\text{O}$  : hexanes);  $\lambda_{\max}$  (DCE, nm) 401 ( $\epsilon = 2.35 \times 10^3$ ), 273 ( $\epsilon = 1.89 \times 10^4$ );  $\nu_{\max}$  (neat,  $\text{cm}^{-1}$ ) 2975, 2934, 2870, 1662 (C=O), 1533, 1519, 1479, 1447, 1371, 1279, 1244, 1183, 1112, 1048;  $\delta_{\text{H}}$  (500 MHz,  $\text{CD}_2\text{Cl}_2$ ) 1.12 (12H, s), 1.27 (12H, s), 1.35–1.37 (4H, m), 1.46–1.57 (8H, bs), 4.08 (6H, s,  $\text{NCH}_3$ ), 4.91–5.13 (4H, bs), 6.69 (2H, s);  $\delta_{\text{C}}$  (150 MHz,  $\text{CD}_2\text{Cl}_2$ ) 16.9 ( $\text{CH}_2$ ), 19.8 ( $\text{CH}_3$ ), 32.7 ( $\text{NCH}_3$ ), 32.9 ( $\text{CH}_3$ ), 39.6 ( $\text{CH}_2$ ), 60.1 (C), 70.7 ( $\text{CH}_2$ ), 131.7 (C), 136.0 (CH), 140.4, 140.7, 151.7 (all C), 177.4, 178.5 (both C=O); HRMS (ESI)  $m/z$   $[\text{M} + \text{H}]^+$ ,  $\text{C}_{36}\text{H}_{49}\text{N}_6\text{O}_6$  calcd. 661.3714, observed 661.3716.

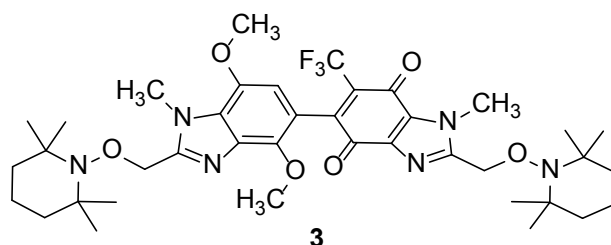

**Synthesis of 4',7'-dimethoxy-1,1'-dimethyl-2,2'-bis{[(2,2,6,6-tetramethylpiperidin-1-yl)oxy]methyl}-6-(trifluoromethyl)-1H,1'H-[5,5'-bibenzimidazole]-4,7-dione (**3**)**

*t*BuOOH (133  $\mu$ L, 70% in  $H_2O$ , 1.11 mmol) was added dropwise to 5,5'-dimethoxybenzimidazole-benzimidazolequinone **2** (0.18 g, 0.26 mmol),  $NaSO_2CF_3$  (0.122 g, 0.78 mmol), and  $Cu(OTf)_2$  (9 mg, 0.03 mmol) in MeCN (3 mL) at rt under Ar. After 2 h of stirring,  $H_2O$  (15 mL) was added, and the precipitate filtered. Purification of the precipitate by flash chromatography using EtOAc and hexanes as eluent gave trifluoromethylquinone **3** as a deep red oil (0.106 g, 54%);  $R_f$  0.43 (2 : 3 EtOAc : hexanes);  $\nu_{max}$  (neat,  $cm^{-1}$ ) 2973, 2931, 1670 (C=O), 1611, 1502, 1466, 1375, 1361, 1297, 1262, 1245, 1175, 1130, 1041, 990;  $\delta_H$  (500 MHz,  $CDCl_3$ ) 1.09–1.11 (12H, m,  $CH_3$ ), 1.24–1.38 (14H, m), 1.49–1.55 (10H, m), 3.85 (3H, s,  $OCH_3$ ), 4.13 (3H, s,  $NCH_3$ ), 4.15 (3H, s,  $NCH_3$ ), 4.16 (3H, s,  $OCH_3$ ), 5.038 (2H, s), 5.043 (2H, s), 6.27 (1H, s);  $\delta_C$  (125 MHz,  $CDCl_3$ ) 16.9, 17.0 (both  $CH_2$ ), 20.1 ( $CH_3$ ), 32.9, 33.1 (both  $NCH_3$ ), 33.2 ( $CH_3$ ), 39.66, 39.72 (both  $CH_2$ ), 55.9 ( $OCH_3$ ), 60.1, 60.2 (both C), 61.1 ( $OCH_3$ ), 70.8, 71.7 (both  $CH_2$ ), 104.5 (CH), 113.8 (C), 121.7 (q,  $J = 276.6$  Hz,  $CF_3$ ), 128.7 (C), 130.6 (q,  $J = 27.5$  Hz, C6), 131.2, 135.4, 140.5, 142.1, 143.2, 147.84–147.85 (m), 150.2, 152.3 (all C), 174.6, 178.1 (both C=O);  $\delta_F$  (470 MHz,  $CDCl_3$ ) – 56.69; HRMS (ESI)  $m/z$   $[M + H]^+$ ,  $C_{39}H_{54}N_6O_6F_3$  calcd. 759.4057, observed 759.4066.

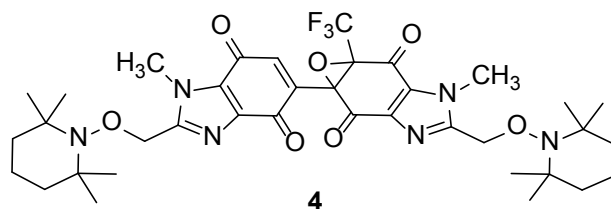

**3-Methyl-6a-(1-methyl-4,7-dioxo-2-{[(2,2,6,6-tetramethylpiperidin-1-yl)oxy]methyl}-4,7-dihydro-1H-benzimidazol-5-yl)-4-{[(2,2,6,6-tetramethylpiperidin-1-yl)oxy]methyl}-1a-(trifluoromethyl)-1aH-oxireno[f]benzimidazole-2,6(3H,6aH)-dione (**4**)**, according to procedure A: 116 mg, 78%; yellow solid; mp 150–152  $^{\circ}C$  (deg);  $R_f$  0.56 (3 : 7 EtOAc : hexanes);  $\lambda_{max}$  (DCE, nm) 400 ( $\epsilon = 9.31 \times 10^2$ ), 313 ( $\epsilon = 5.60 \times 10^3$ );  $\nu_{max}$  (neat,  $cm^{-1}$ ) 2931,

1695 (C=O), 1664 (C=O), 1517, 1477, 1361, 1292, 1212, 1182, 1126, 1034;  $\delta_{\text{H}}$  (500 MHz,  $\text{CDCl}_3$ ) 1.10 (12H, s), 1.21–1.25 (12H, m), 1.33–1.36 (2H, m), 1.43–1.56 (10H, bs), 4.11 (3H, s,  $\text{NCH}_3$ ), 4.13 (3H, s,  $\text{NCH}_3$ ), 5.02 (2H, s), 5.03 (2H, s), 6.78 (1H, s);  $\delta_{\text{C}}$  (125 MHz,  $\text{CDCl}_3$ ) 16.90, 16.93 (both  $\text{CH}_2$ ), 20.08, 20.11 (both  $\text{CH}_3$ ), 32.9, 33.19, 33.25, 33.4 (all  $\text{CH}_3$ ), 39.67, 39.69 (both  $\text{CH}_2$ ), 60.2, 60.3 (both C), 63.4 (q,  $J = 33.9$  Hz, C- $\text{CF}_3$ ), 65.6 (C), 70.72, 70.74 (both  $\text{CH}_2$ ), 120.4 (q,  $J = 280.7$  Hz,  $\text{CF}_3$ ), 131.3, 132.2 (both C), 135.1 (CH), 138.9, 140.2, 140.4, 151.8, 154.2 (all C), 176.1, 176.9, 178.1, 179.5 (all C=O);  $\delta_{\text{F}}$  (470 MHz,  $\text{CDCl}_3$ ) – 65.81; HRMS (ESI)  $m/z$   $[\text{M} + \text{H}]^+$ ,  $\text{C}_{37}\text{H}_{48}\text{N}_6\text{O}_7\text{F}_3$  calcd. 745.3537, observed 745.3547.

## References in Supplementary Information

1. D. J. Van Hoomissen and S. Vyas, *J. Org. Chem.*, 2017, **82**, 5731. <https://doi.org/10.1021/acs.joc.7b00549>.
2. A. Paul, A. Biswas, S. Sinha, S. S. Shah, M. Bera, M. Mandal and N. D. P. Singh, *Org. Lett.*, 2019, **21**, 2968. <https://doi.org/10.1021/acs.orglett.9b00124>.
3. Y. Chen and M. G. Steinmetz, *Org. Lett.*, 2005, **17**, 3729. <https://doi.org/10.1021/ol051362k>.
4. M. A. Phillips, *J. Chem. Soc.*, 1928, 2393. <https://doi.org/10.1039/JR9280002393>.
5. A. Gellis, H. Kovacic, N. Boufatah and P. Vanelle, *Eur. J. Med. Chem.*, 2008, **43**, 1858. <https://doi.org/10.1016/j.ejmech.2007.11.020>.
6. L. M. Harwood, *Aldrichimica Acta*, 1985, **18**, 25.
7. M. J. Frisch, G. W. Trucks, H. B. Schlegel, G. E. Scuseria, M. A. Robb, J. R. Cheeseman, G. Scalmani, V. Barone, G. A. Petersson, H. Nakatsuji, X. Li, M. Caricato, A. V. Marenich, J. Bloino, B. G. Janesko, R. Gomperts, B. Mennucci, H. P. Hratchian, J. V. Ortiz, A. F. Izmaylov, J. L. Sonnenberg, D. Williams-Young, F. Ding, F. Lipparini, F. Egidi, J. Goings, B. Peng, A. Petrone, T. Henderson, D. Ranasinghe, V. G. Zakrzewski, J. Gao, N. Rega, G. Zheng, W. Liang, M. Hada, M. Ehara, K. Toyota, R. Fukuda, J. Hasegawa, M. Ishida, T. Nakajima, Y. Honda, O. Kitao, H. Nakai, T. Vreven, K. Throssell, J. A. Montgomery, Jr., J. E. Peralta, F. Ogliaro, M. J. Bearpark, J. J. Heyd, E. N. Brothers, K. N. Kudin, V. N. Staroverov, T. A. Keith, R. Kobayashi, J. Normand, K. Raghavachari, A. P. Rendell, J. C. Burant, S. S. Iyengar, J. Tomasi, M. Cossi, J. M. Millam, M. Klene, C. Adamo, R. Cammi, J. W. Ochterski, R. L. Martin, K. Morokuma, O. Farkas, J. B. Foresman and D. J. Fox, Gaussian 16, Revision B.01, Gaussian, Inc., Wallingford CT, 2016.
8. Y. Zhao and D. G. Truhlar, *Theor. Chem. Acc.*, 2008, **120**, 215. <https://doi.org/10.1007/s00214-007-0310-x>.
9. C. Amovilli, V. Barone, R. Cammi, E. Cancès, M. Cossi, B. Mennucci, C. S. Pomelli and J. Tomasi, *J. Adv. Quant. Chem.*, 1998, **32**, 227. [https://doi.org/10.1016/S0065-3276\(08\)60416-5](https://doi.org/10.1016/S0065-3276(08)60416-5).
10. R. L. Martin, *J. Chem. Phys.*, 2003, **118**, 4775. <https://doi.org/10.1063/1.1558471>.
11. G. Sheldrick, *Acta Crystallogr. Sect. A: Found. Crystallogr.*, 2015, **71**, 3. <https://doi.org/10.1107/S2053273314026370>.
12. G. Sheldrick, *Acta Crystallogr. Sect. C: Cryst. Struct. Commun.*, 2015, **71**, 3. <https://doi.org/10.1107/S2053229614024218>.
13. P. McArdle, *J. Appl. Crystallogr.*, 2017, **50**, 320. <https://doi.org/10.1107/S1600576716018446>.
14. F. Aldabbagh, W. K. Busfield, I. D. Jenkins and S. H. Thang, *Tetrahedron Lett.*, 2000, **41**, 3673. [https://doi.org/10.1016/S0040-4039\(00\)00440-8](https://doi.org/10.1016/S0040-4039(00)00440-8).

## Appendix

### Tables Referenced in Supplementary Information

**Table A1** DFT model energies associated with Table 2.

| compd                                                                                                              | multiplicity | EE (Hartrees) | EE + thermal free energy correction (Hartrees) |
|--------------------------------------------------------------------------------------------------------------------|--------------|---------------|------------------------------------------------|
| <b>TEMPO-Vis</b>                                                                                                   | singlet      | − 1090.676089 | − 1090.311417                                  |
| <b>TEMPO-Vis</b>                                                                                                   | triplet      | − 1090.594405 | − 1090.232441                                  |
| <b>QM-rad</b>                                                                                                      | doublet      | − 606.984531  | − 606.875713                                   |
| <b>Bis-TEMPO-Vis</b>                                                                                               | singlet      | − 2180.186815 | − 2179.453072                                  |
| <b>Bis-TEMPO-Vis</b>                                                                                               | triplet      | − 2180.103807 | − 2179.371002                                  |
| 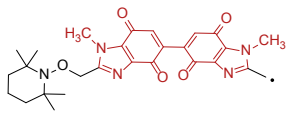<br><b>Bis-TEMPO-Vis radical</b> | doublet      | − 1696.486519 | − 1696.009845                                  |
| <b>4</b>                                                                                                           | singlet      | − 2592.424110 | − 2591.685608                                  |
| <b>4</b>                                                                                                           | triplet      | − 2592.339550 | − 2591.605755                                  |
| <br><b>4 quinone-radical</b>    | doublet      | − 2108.723751 | − 2108.244338                                  |
| <br><b>4 epoxide-radical</b>    | doublet      | − 2108.723151 | − 2108.242497                                  |
| <b>2</b>                                                                                                           | singlet      | − 2259.989495 | − 2259.180506                                  |
| <b>2</b>                                                                                                           | triplet      | − 2259.921214 | − 2259.113174                                  |
| <br><b>2 quinone-radical</b>    | doublet      | − 1776.289571 | − 1775.737561                                  |
| <br><b>2 dimethoxy-radical</b>  | doublet      | − 1776.289116 | − 1775.734596                                  |
| <b>TEMPO</b>                                                                                                       | doublet      | − 483.631085  | − 483.403280                                   |

**Table A2** Single crystal X-ray data and structure refinement for **Bis-TEMPO-Vis** (thermal ellipsoids set at 50% probability). The dihedral angle defined by C6-C5-C5'-C6' is 55.6°.

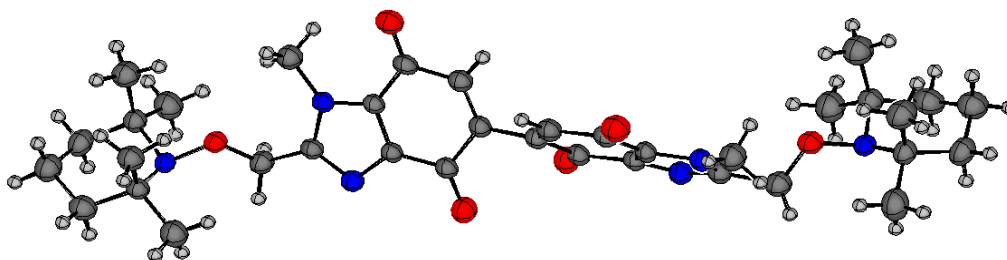

|                                   |                                                               |          |
|-----------------------------------|---------------------------------------------------------------|----------|
| Empirical formula                 | C <sub>36</sub> H <sub>48</sub> N <sub>6</sub> O <sub>6</sub> |          |
| Formula weight                    | 660.80                                                        |          |
| Temperature                       | 298.9(5) K                                                    |          |
| Wavelength                        | 0.71073 Å                                                     |          |
| Crystal system                    | Orthorhombic                                                  |          |
| Space group                       | P2 <sub>1</sub> 2 <sub>1</sub> 2 <sub>1</sub>                 |          |
| Unit cell dimensions              | a = 6.0407(3) Å                                               | α = 90°. |
|                                   | b = 21.1209(12) Å                                             | β = 90°. |
|                                   | c = 27.1076(14) Å                                             | γ = 90°. |
| Volume                            | 3458.5(3) Å <sup>3</sup>                                      |          |
| Z                                 | 4                                                             |          |
| Density (calculated)              | 1.269 Mg/m <sup>3</sup>                                       |          |
| Absorption coefficient            | 0.087 mm <sup>-1</sup>                                        |          |
| F(000)                            | 1416                                                          |          |
| Crystal size                      | 0.50 x 0.40 x 0.20 mm <sup>3</sup>                            |          |
| Theta range for data collection   | 3.455 to 29.311°.                                             |          |
| Index ranges                      | -6 ≤ h ≤ 8, -28 ≤ k ≤ 21, -32 ≤ l ≤ 35                        |          |
| Reflections collected             | 28054                                                         |          |
| Independent reflections           | 8461 [R(int) = 0.0449]                                        |          |
| Completeness to theta = 25.242°   | 99.6 %                                                        |          |
| Absorption correction             | Semi-empirical from equivalents                               |          |
| Max. and min. transmission        | 1.00000 and 0.62048                                           |          |
| Refinement method                 | Full-matrix least-squares on F <sup>2</sup>                   |          |
| Data / restraints / parameters    | 8461 / 0 / 443                                                |          |
| Goodness-of-fit on F <sup>2</sup> | 1.002                                                         |          |
| Final R indices [I > 2σ(I)]       | R1 = 0.0519, wR2 = 0.1002                                     |          |
| R indices (all data)              | R1 = 0.0942, wR2 = 0.1188                                     |          |
| Absolute structure parameter      | 0.7(5)                                                        |          |
| Extinction coefficient            | n/a                                                           |          |
| Largest diff. peak and hole       | 0.167 and -0.196 e.Å <sup>-3</sup>                            |          |

# NMR Spectra

$^1\text{H}$  NMR (400 MHz) of **1** in  $\text{CDCl}_3$

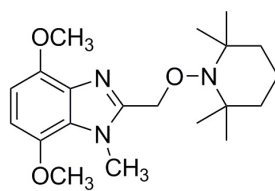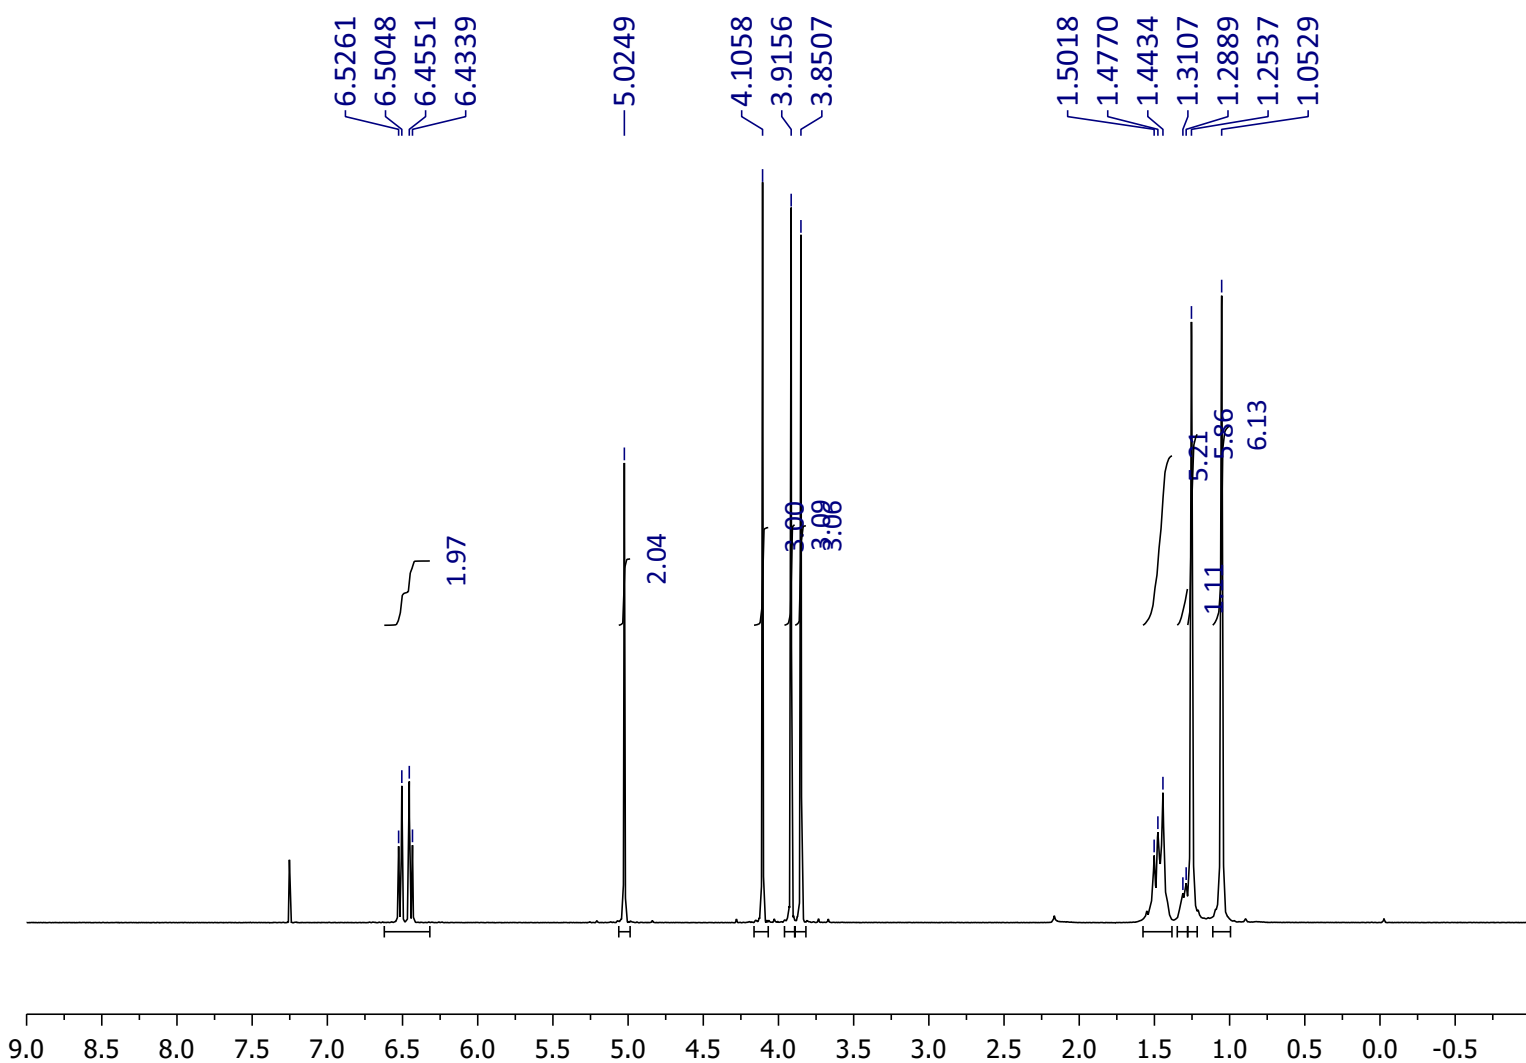

$^{13}\text{C}$  NMR (100 MHz) of **1** in  $\text{CDCl}_3$

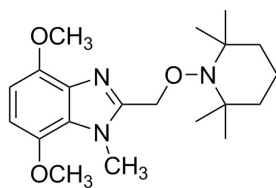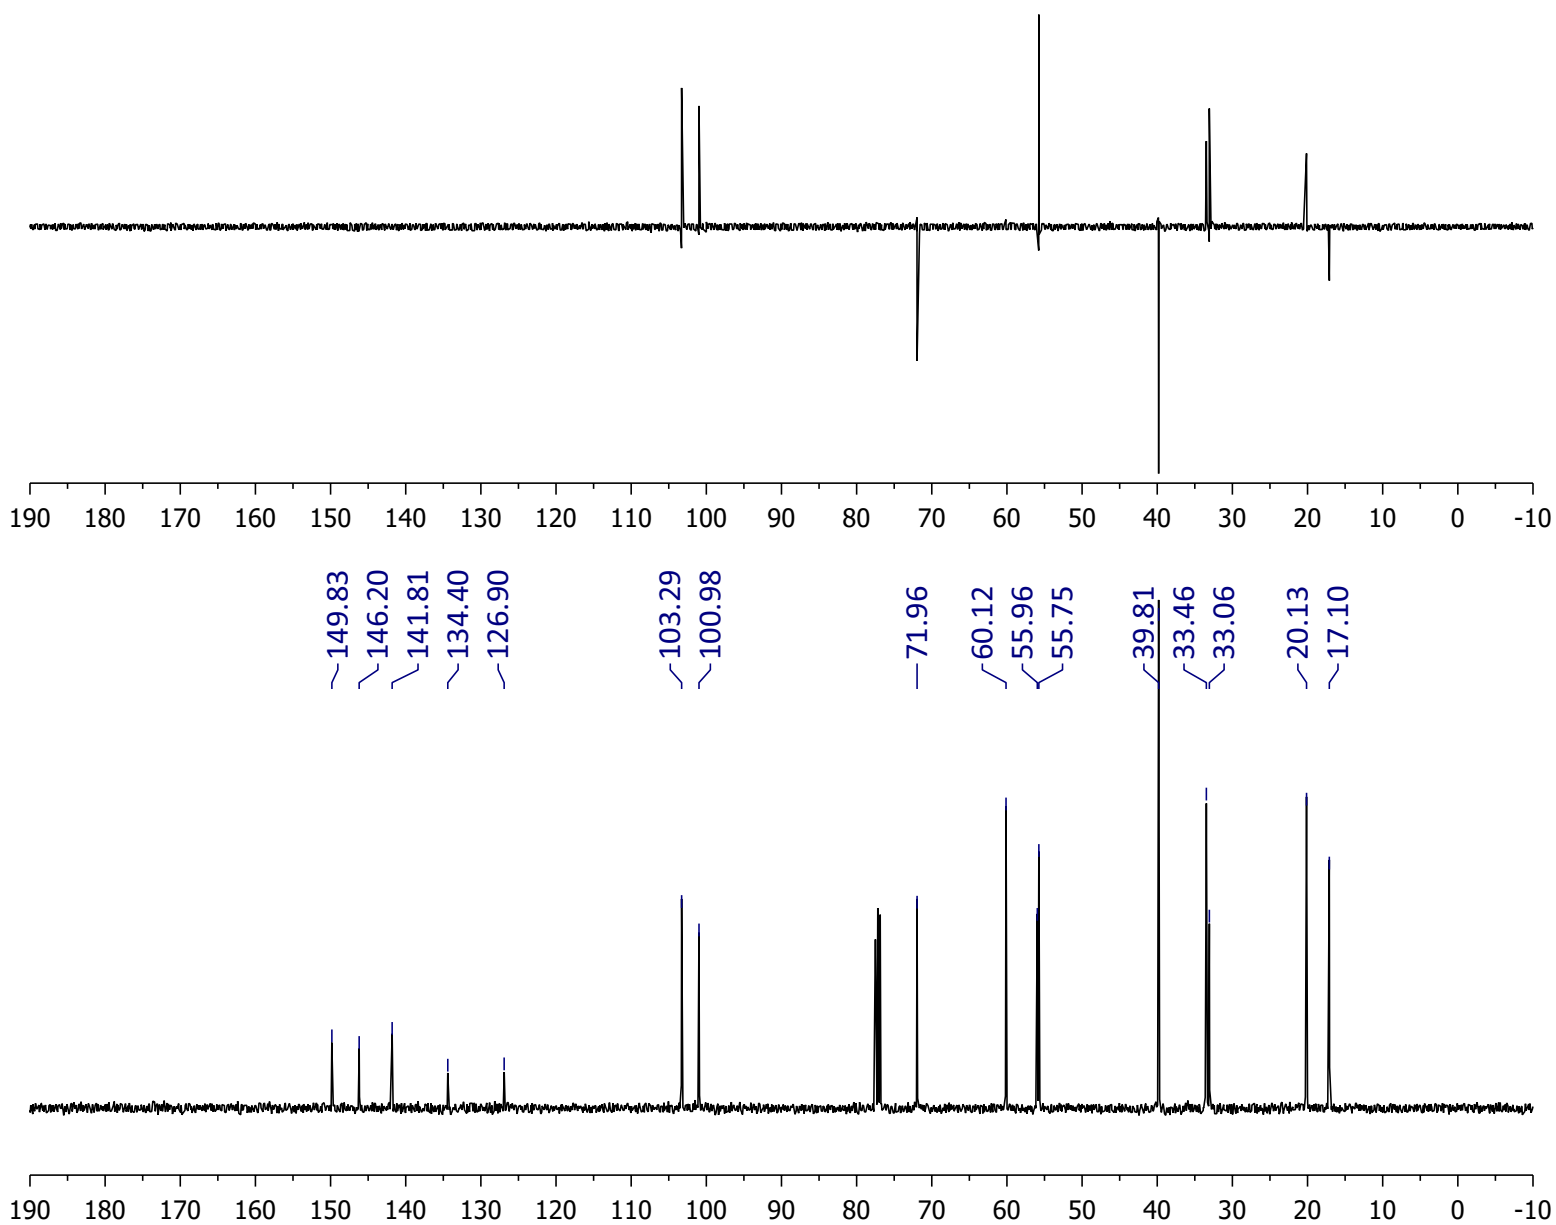



$^1\text{H}$  NMR (500 MHz) of **TEMPO-Vis** in  $\text{CDCl}_3$

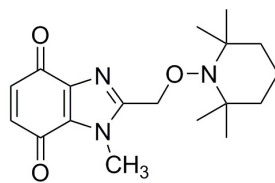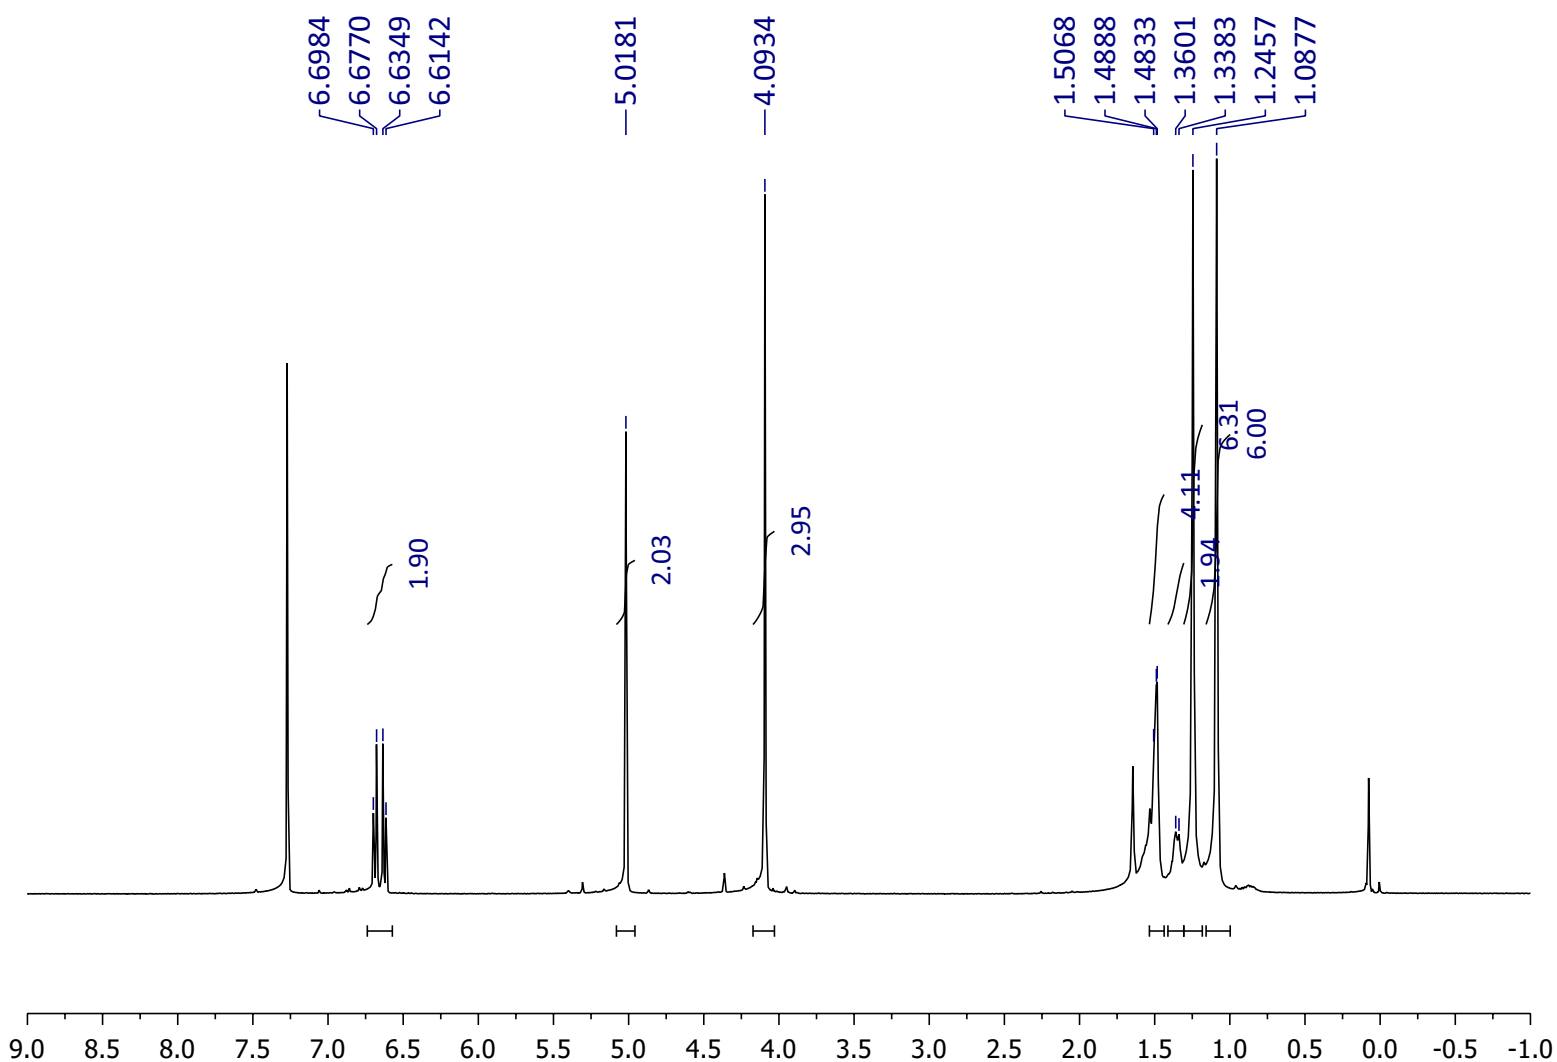

$^{13}\text{C}$  NMR (100 MHz) of **TEMPO-Vis** in  $\text{CDCl}_3$

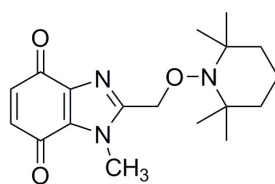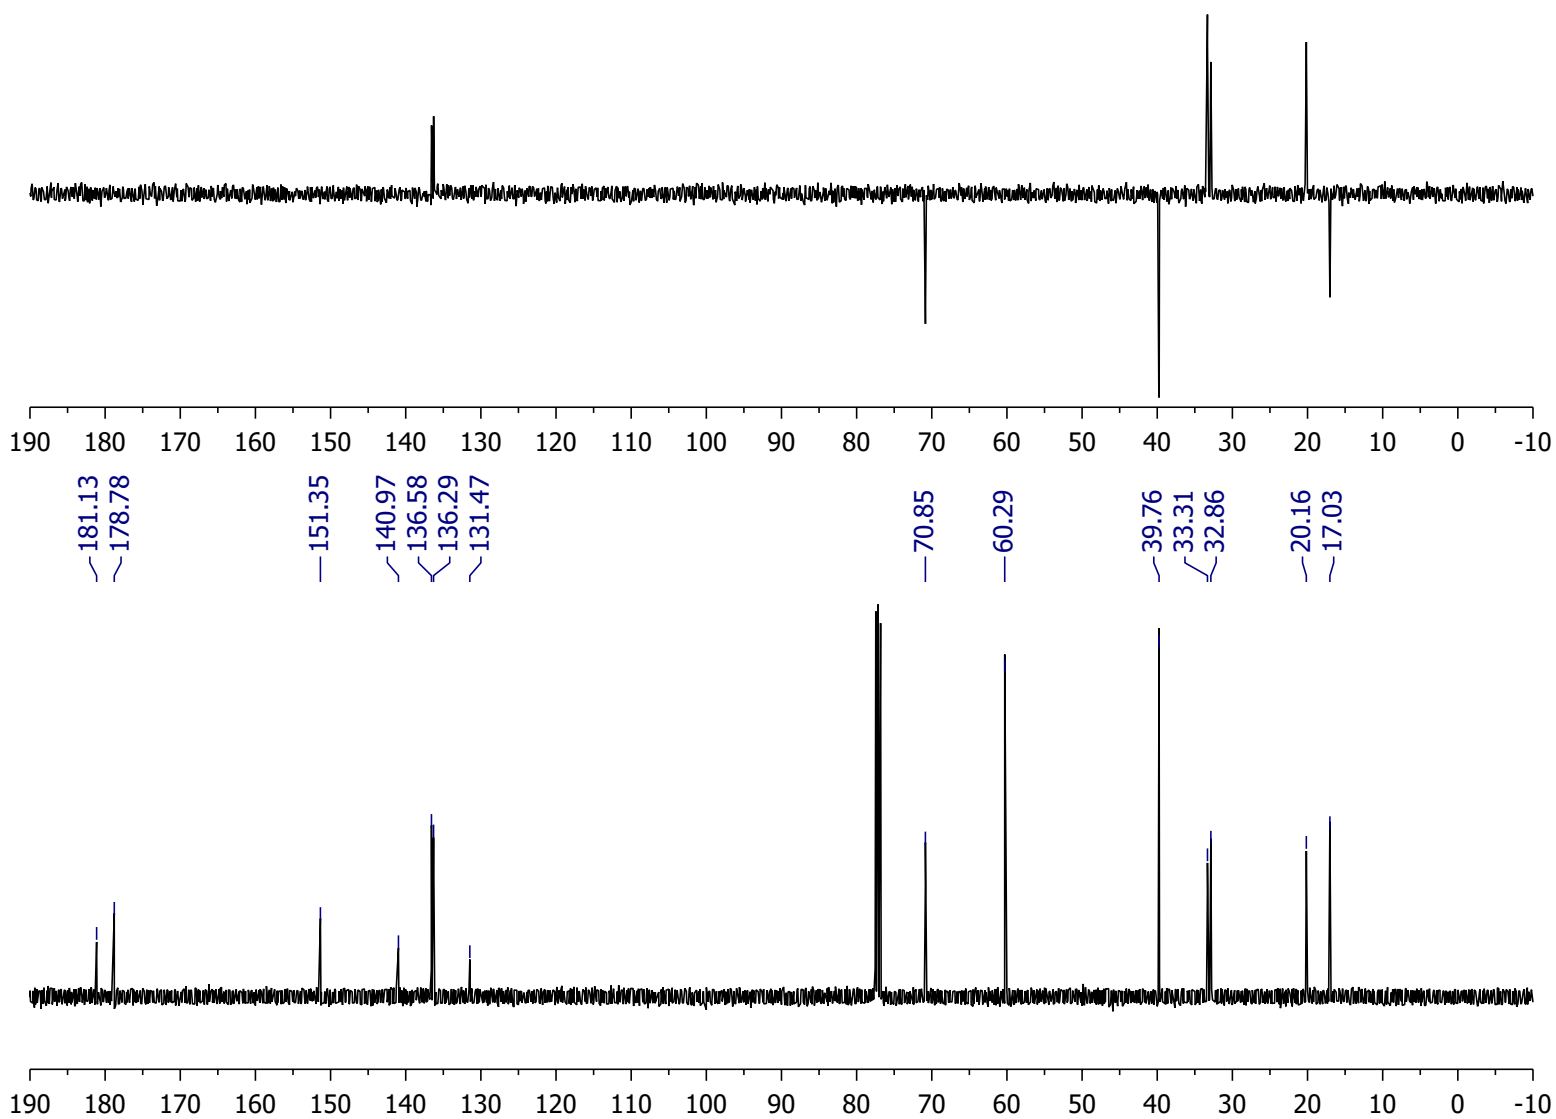

$^1\text{H}$  NMR (400 MHz) of **2** in  $\text{CDCl}_3$

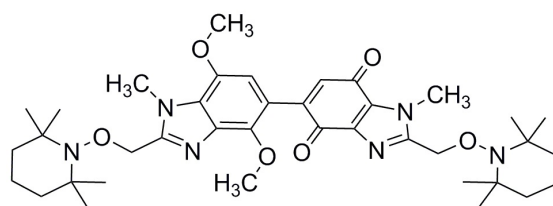

— 6.6589  
— 6.4323

5.0126  
4.9977

4.1470  
4.0914  
4.0824  
3.8583

1.5008  
1.4717  
1.4467  
1.3208  
1.2939  
1.2300  
1.0565  
1.0510

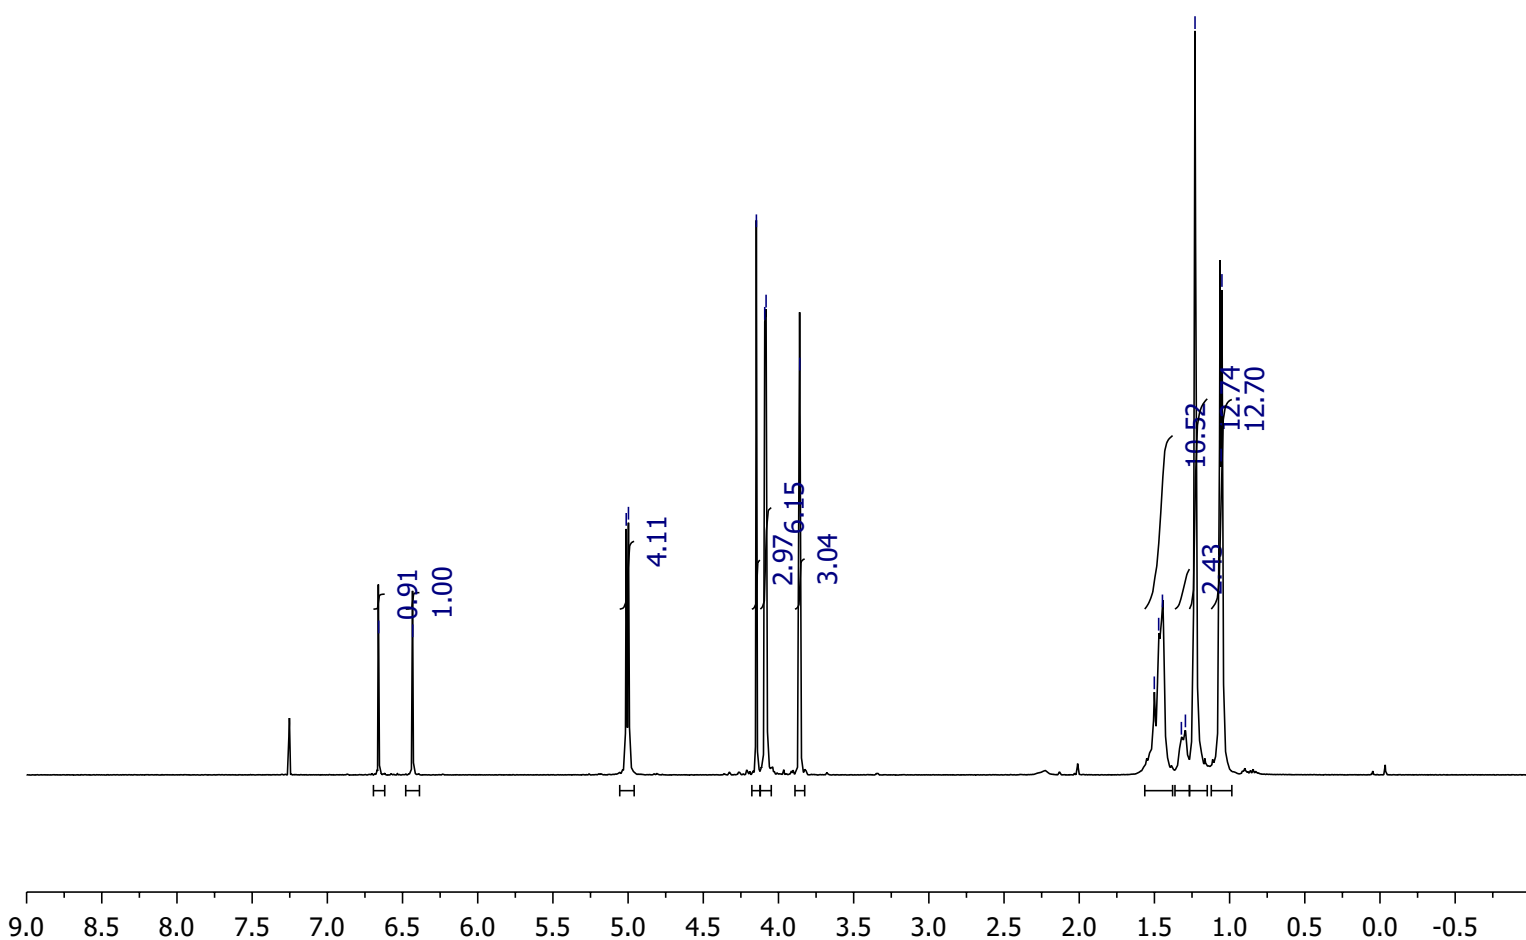

$^{13}\text{C}$  NMR (100 MHz) of **2** in  $\text{CDCl}_3$

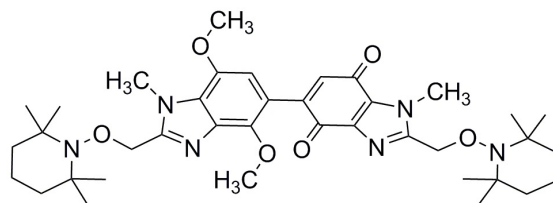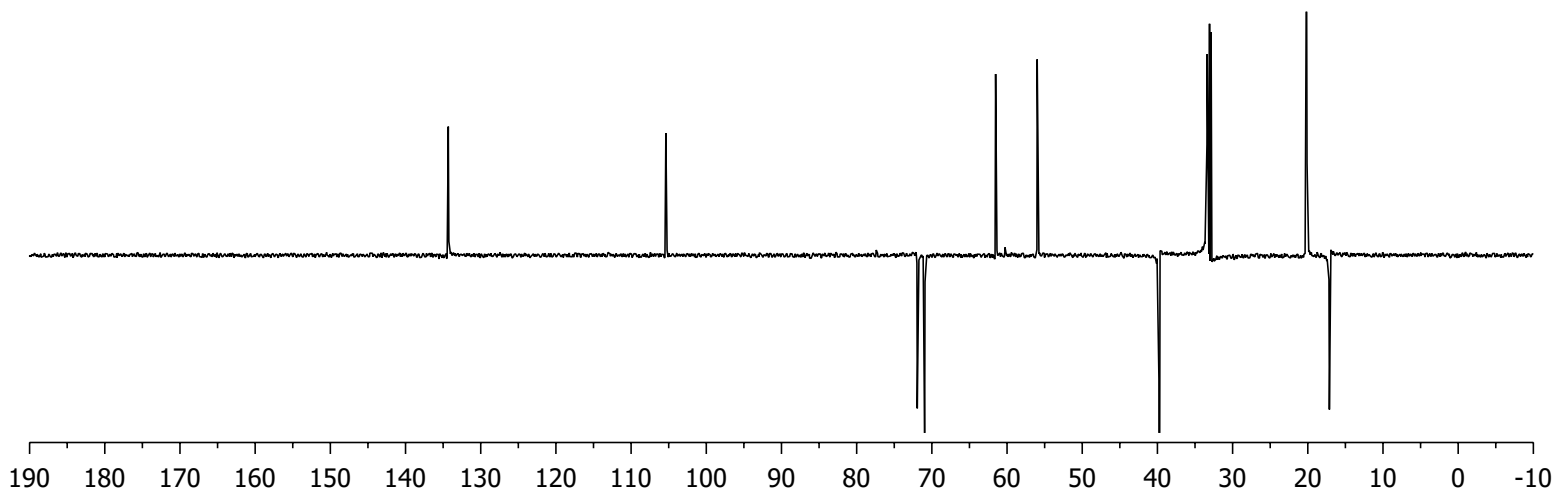

180.14, 178.99, 151.13, 150.50, 146.98, 144.25, 142.66, 141.30, 136.42, 134.31, 131.51, 128.65, 116.80, 105.40, 71.95, 70.97, 61.51, 60.27, 60.14, 55.99, 39.78, 33.38, 33.31, 33.06, 32.85, 20.17, 17.13, 17.04

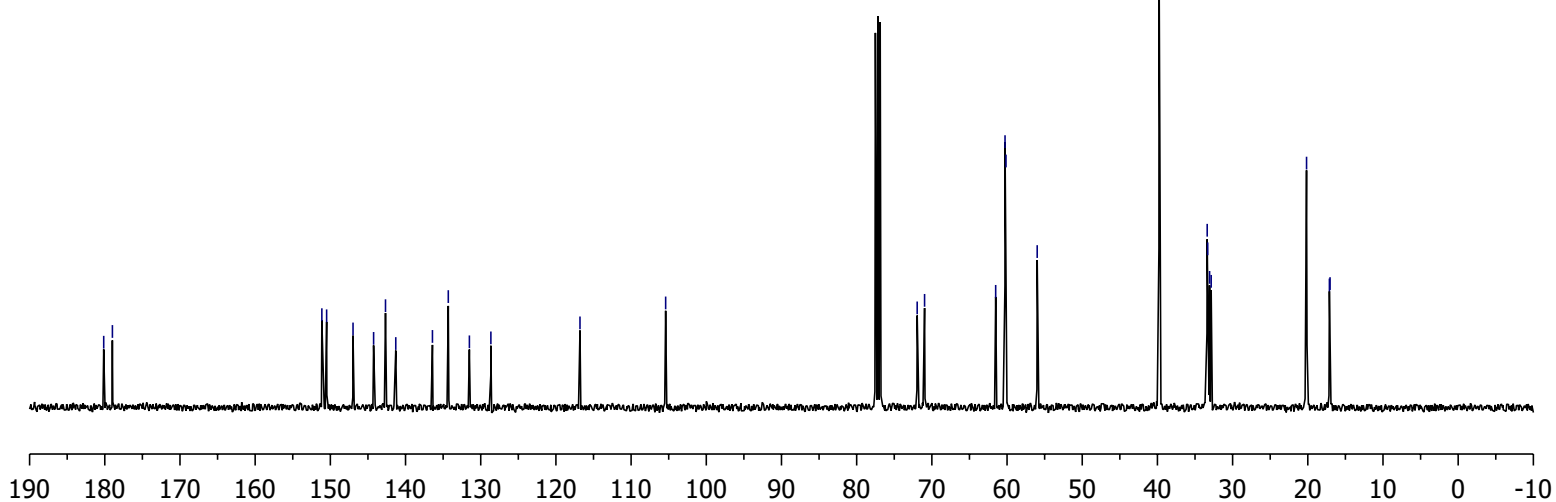

61.51, 60.27, 60.14, 33.38, 33.31, 33.06, 32.85, 17.13, 17.04

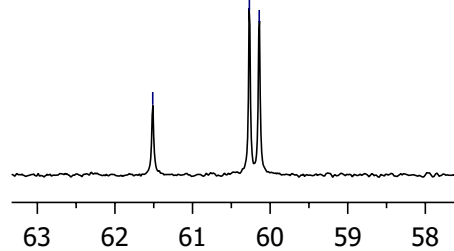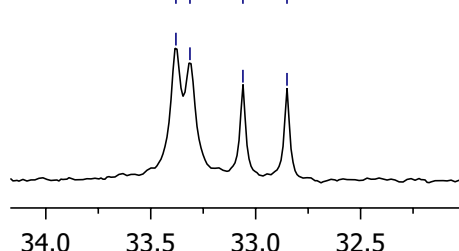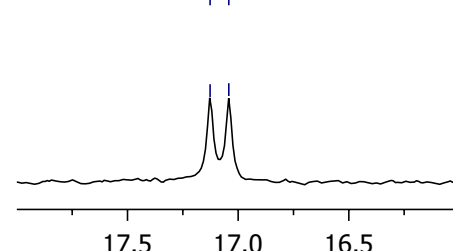

$^1\text{H}$  NMR (500 MHz) of **Bis-TEMPO-Vis** in  $\text{CD}_2\text{Cl}_2$

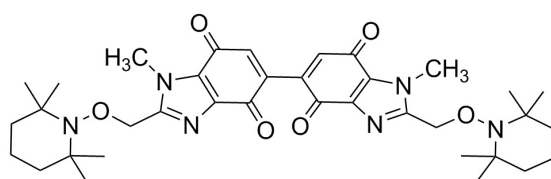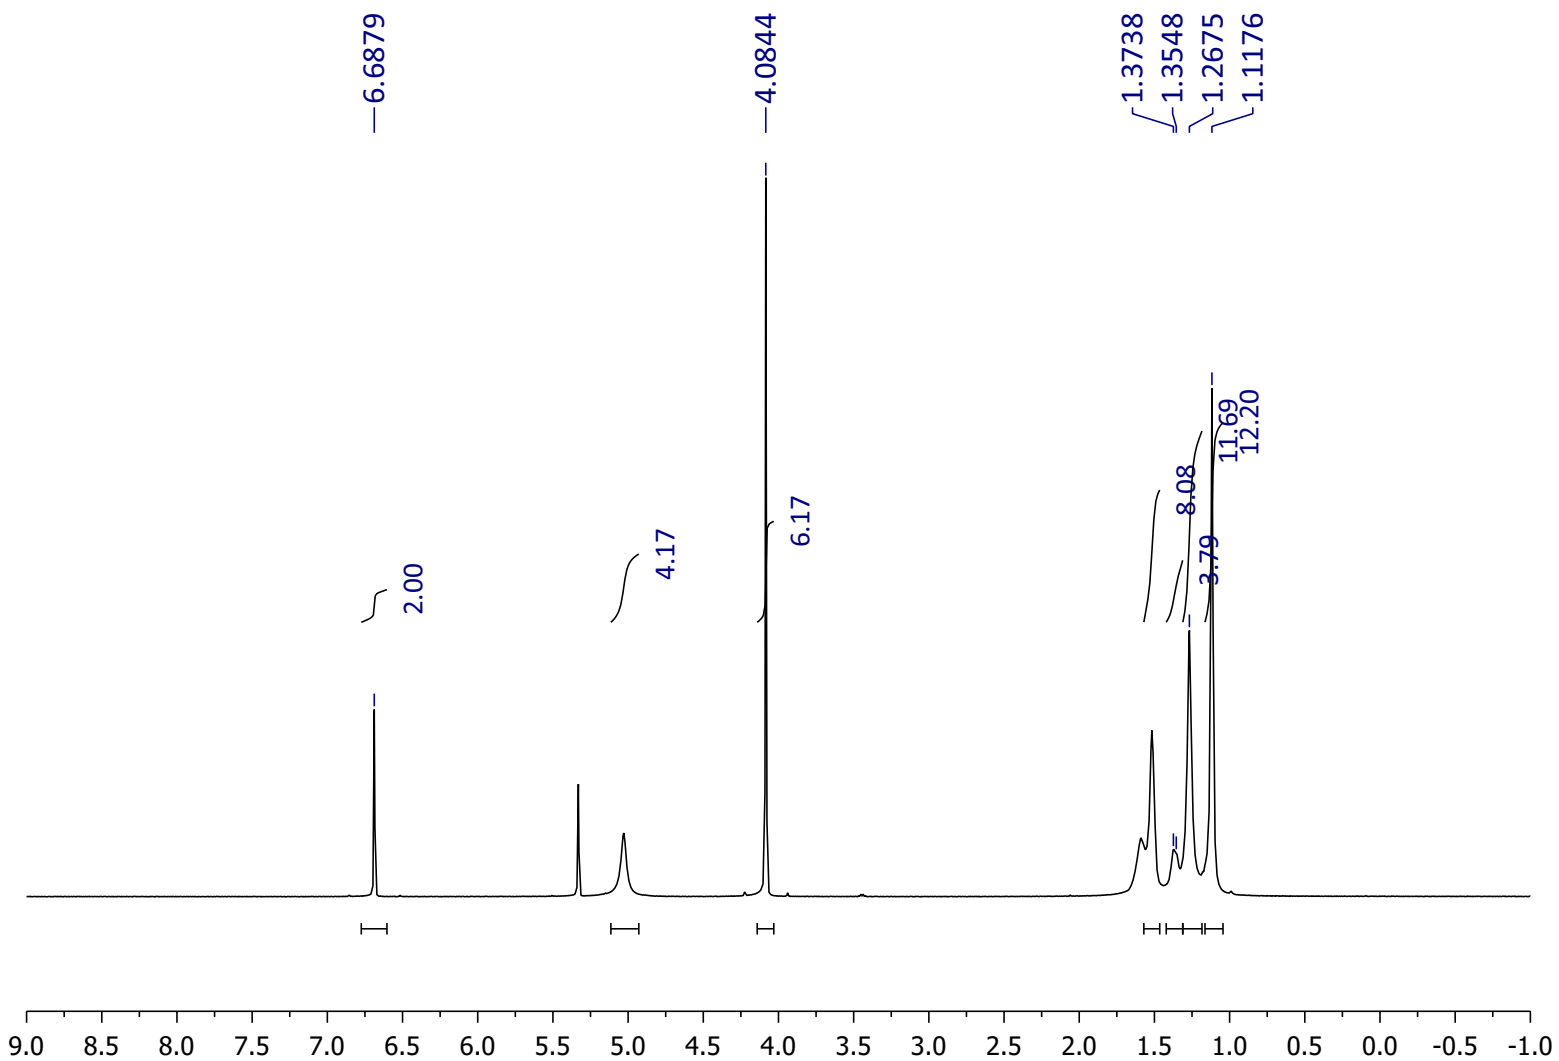

$^{13}\text{C}$  NMR (150 MHz) of **Bis-TEMPO-Vis** in  $\text{CD}_2\text{Cl}_2$

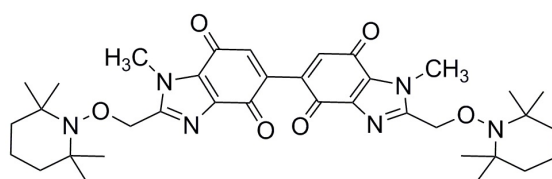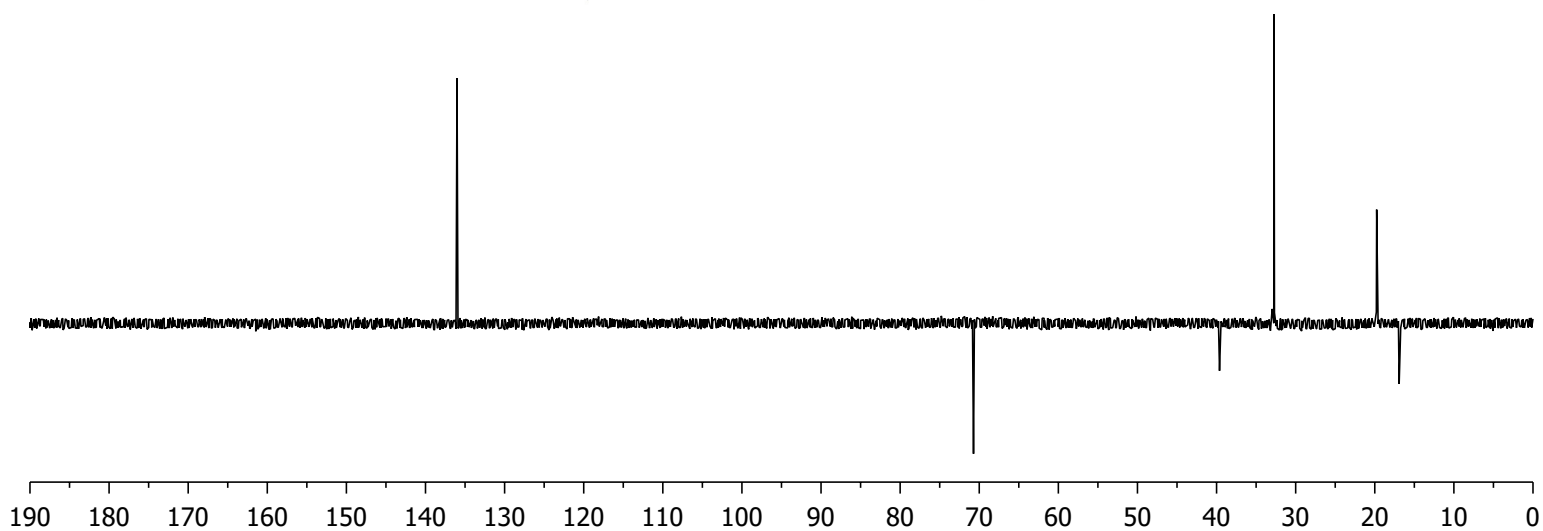

178.52  
177.41

151.73

140.73

140.41

136.01

131.70

70.72

60.12

39.63

32.92

32.73

19.76

16.92

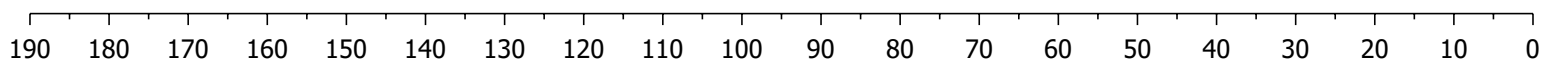

140.73

140.41

32.92

32.73

141.0 140.5 140.0

33.5 33.0 32.5

$^1\text{H}$  NMR (500 MHz) of **3** in  $\text{CDCl}_3$

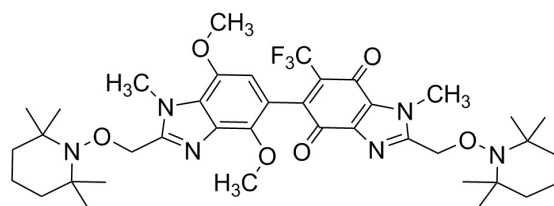

$\delta$  6.2723  
 5.0431 5.0376  
 4.1615 4.1469 4.1306 3.8536  
 1.5450 1.5366 1.4896 1.3766 1.3576 1.3339 1.2810 1.2558 1.2403 1.1054 1.0895

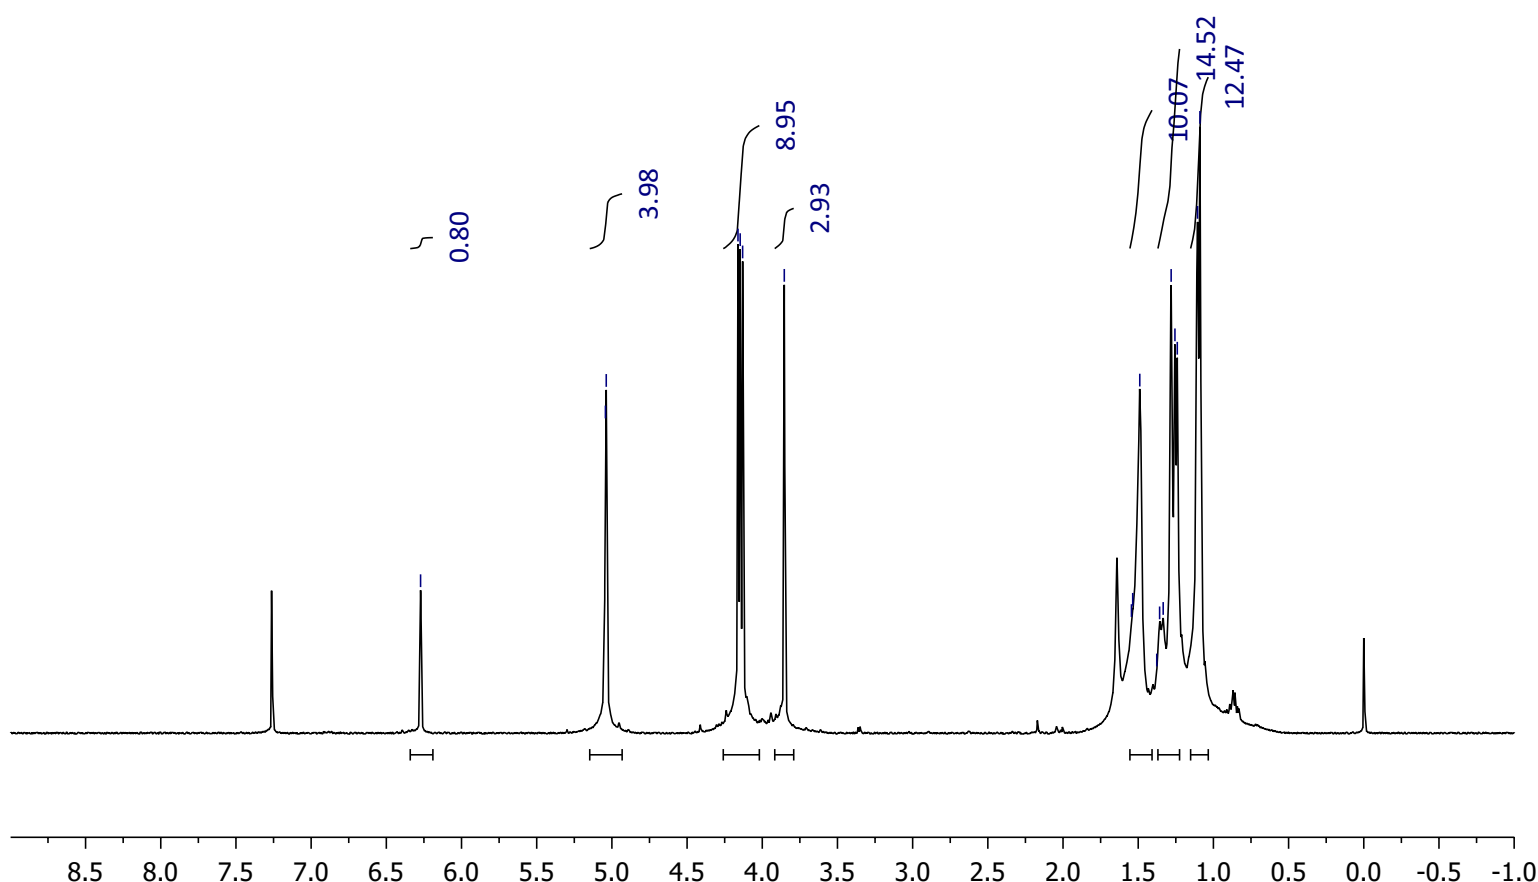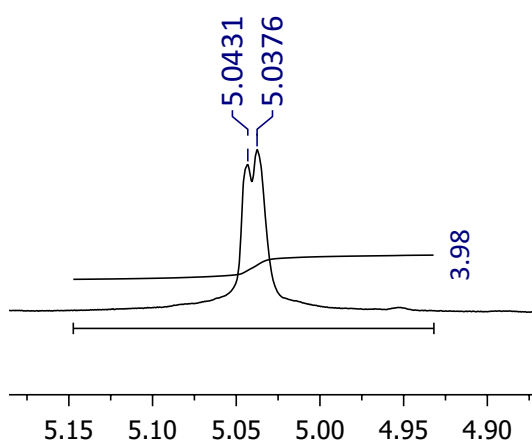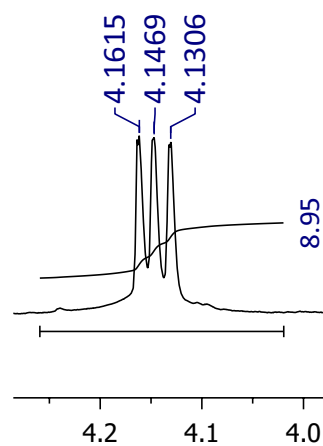

$^{13}\text{C}$  NMR (125 MHz) of **3** in  $\text{CDCl}_3$

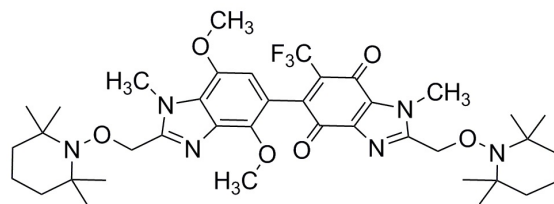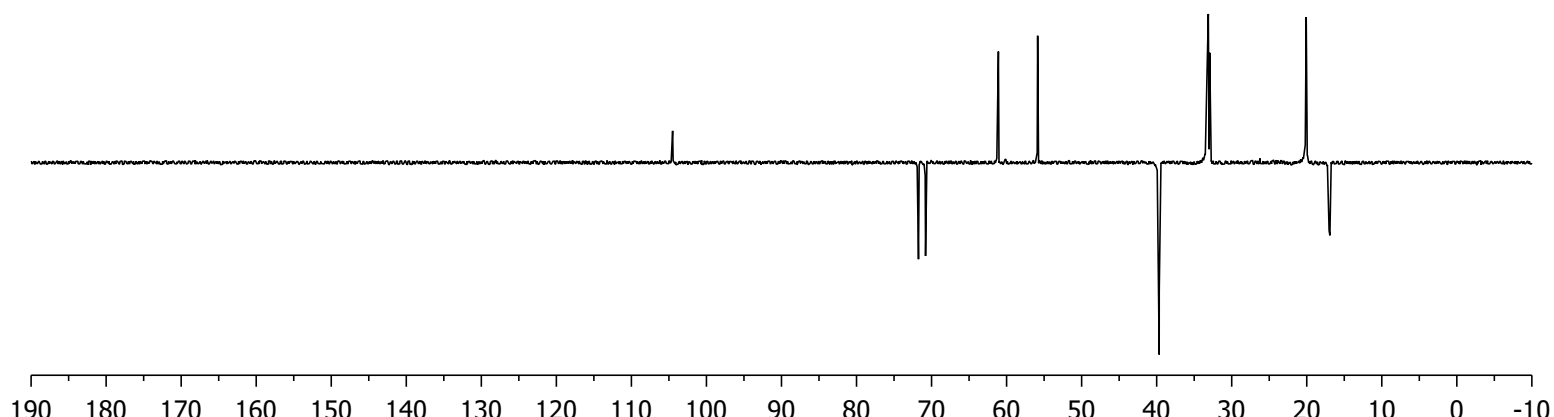

178.1466  
174.6264  
152.3411  
150.1634  
147.8489  
147.8355  
143.1512  
142.1119  
140.5369  
135.4228  
131.2391  
130.9645  
130.7447  
130.5245  
130.3045  
128.7240  
125.0616  
122.8492  
120.6371  
118.4241  
113.7741  
104.5000  
71.7425  
70.8005  
61.0909  
60.2016  
60.0835  
55.8594  
39.7202  
39.6633  
33.2434  
33.1161  
32.9318  
20.0637  
17.0192  
16.9145

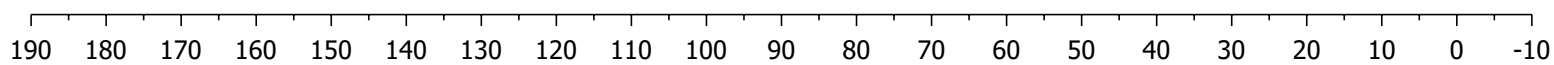

131.2391  
130.9645  
130.7447  
130.5245  
130.3045

61.0909  
60.2016  
60.0835

39.7202  
39.6633

33.2434  
33.1161  
32.9318

17.0192  
16.9145

131.4 130.5

61.2 60.3

40.0 39.6

33.3 32.4

17.5 17.0 16.5



## Key HMBC and ROESY couplings in 3

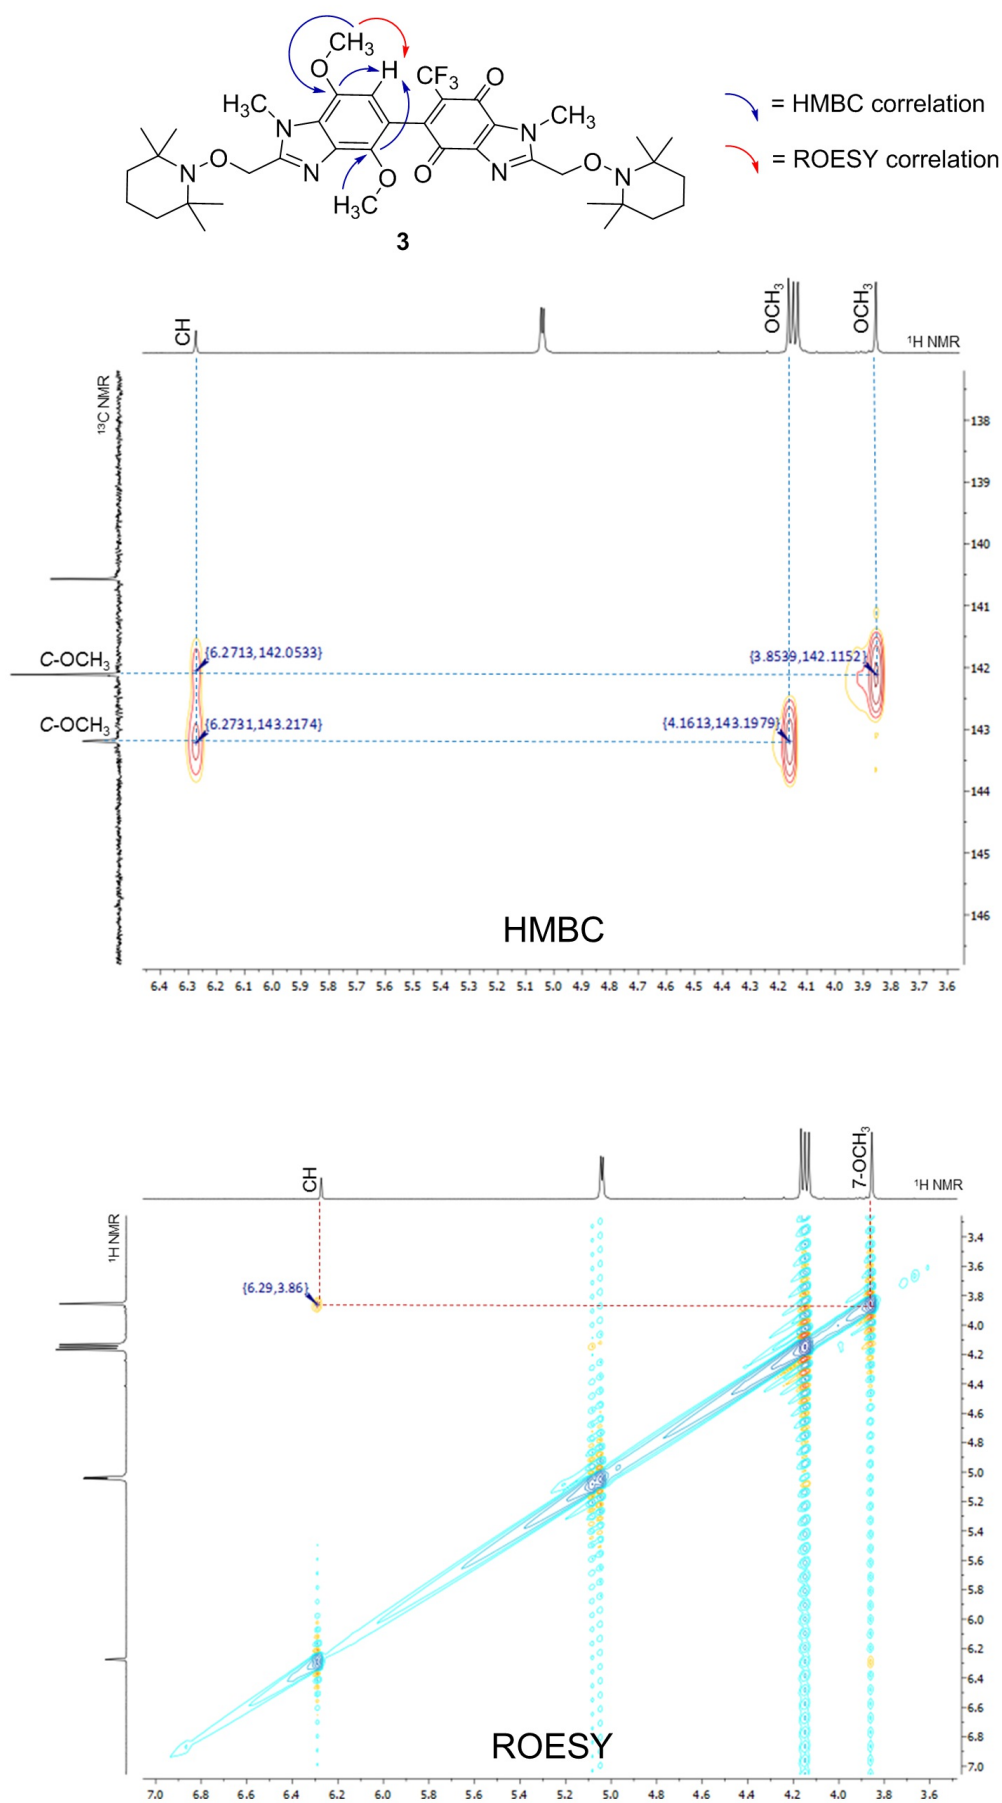

$^{19}\text{F}$  NMR (470 MHz) of **3** in  $\text{CDCl}_3$

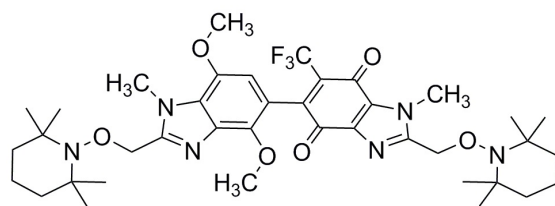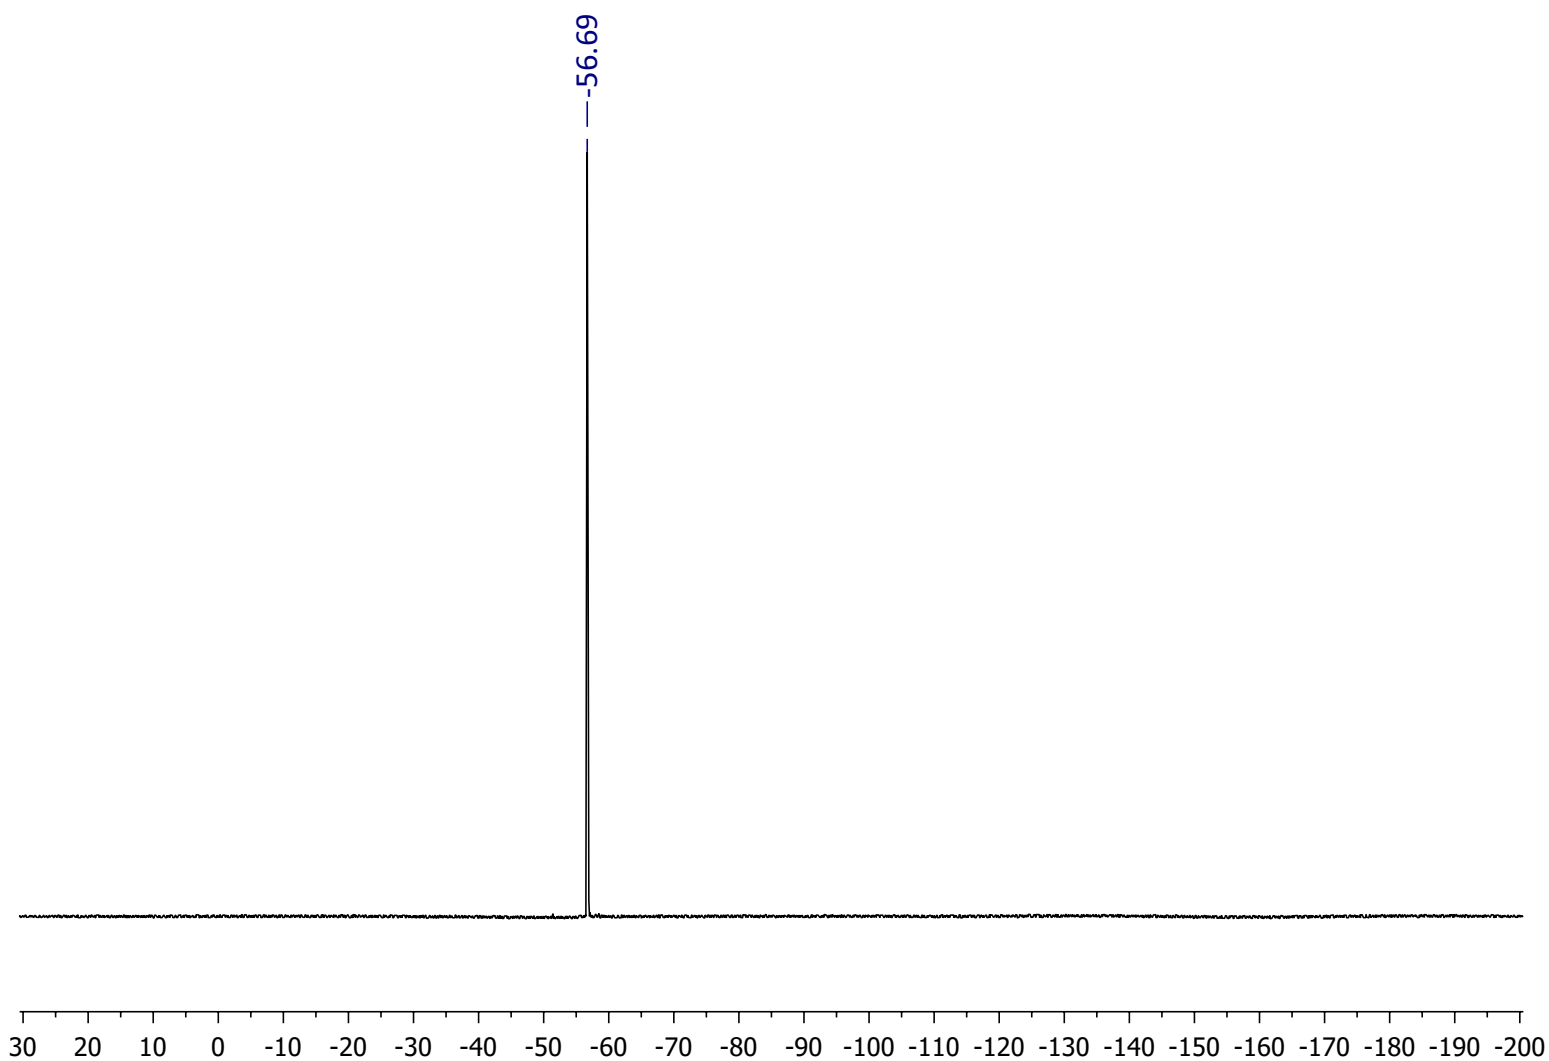

$^1\text{H}$  NMR (500 MHz) of **4** in  $\text{CDCl}_3$

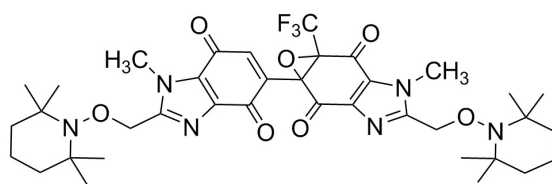

6.7772

5.0279  
5.0185

4.1287  
4.1133

1.3578  
1.3347  
1.2540  
1.2349  
1.2139  
1.1029

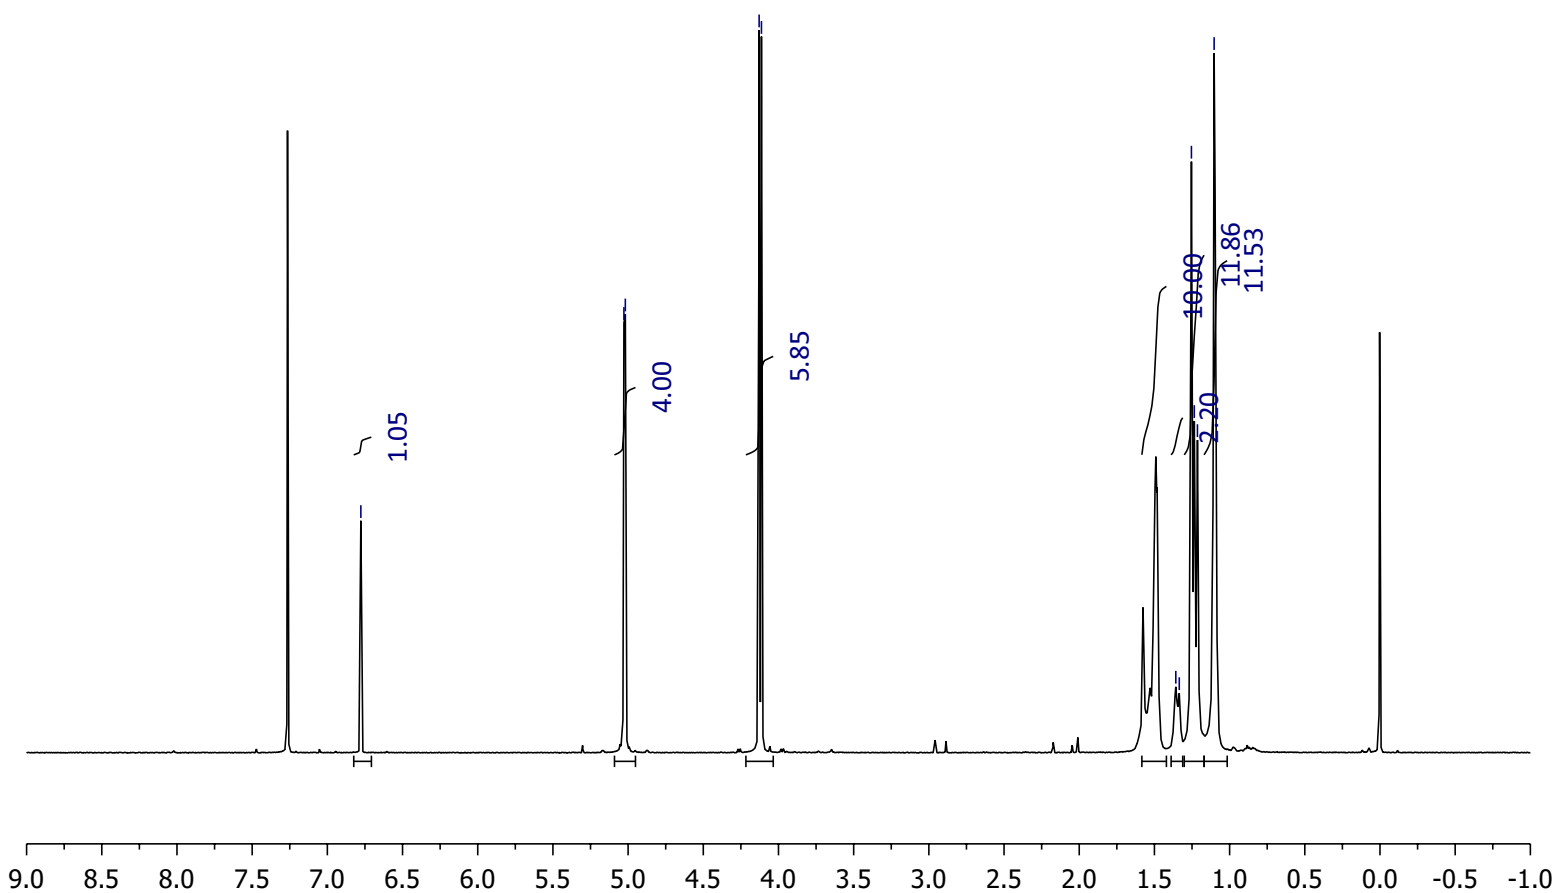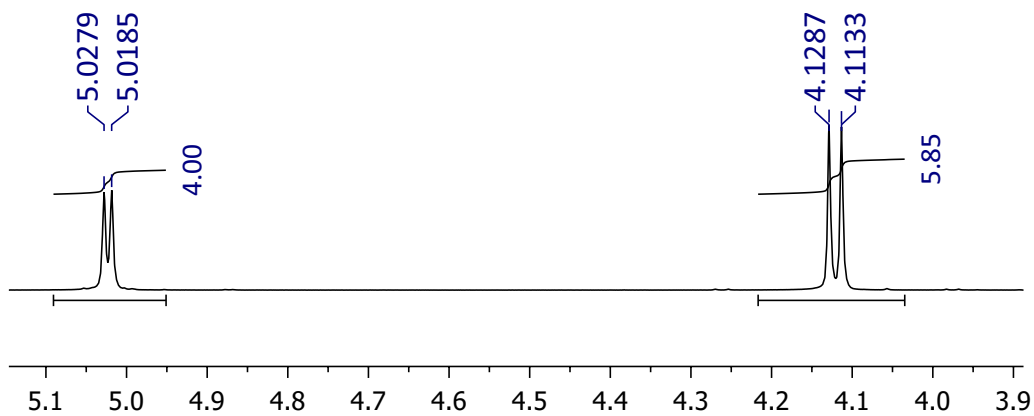

$^{13}\text{C}$  NMR (125 MHz) of **4** in  $\text{CDCl}_3$

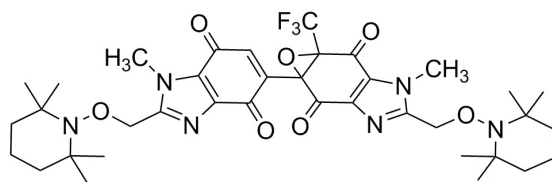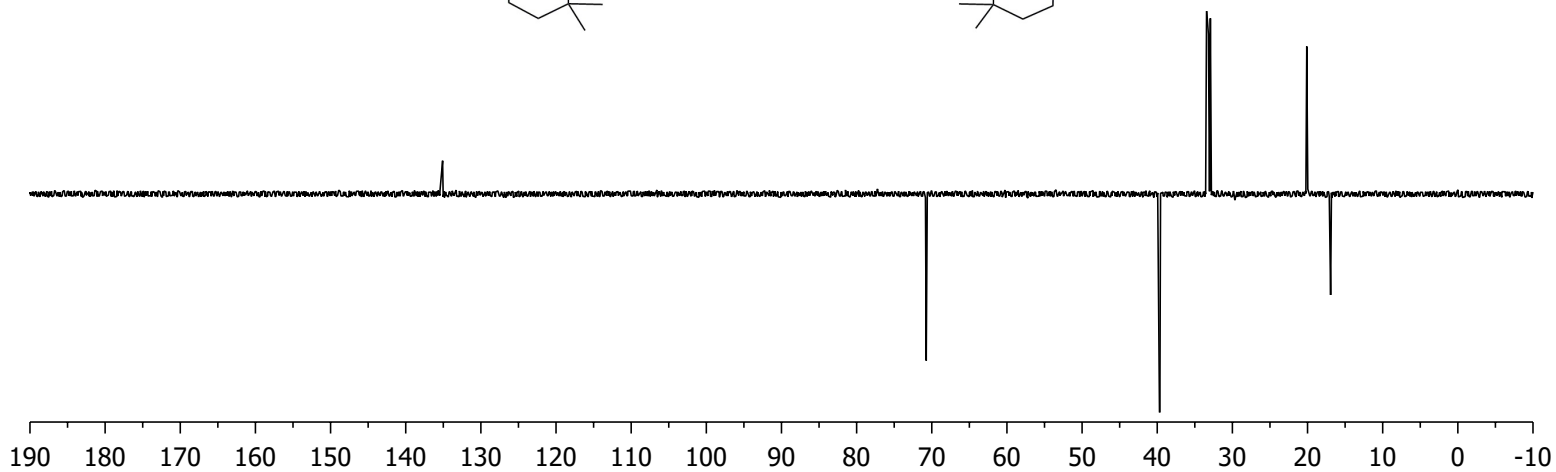

179.5095  
178.0775  
176.9346  
176.1467

154.2098  
151.7820  
140.3949  
140.1846  
138.9216  
135.0923  
132.1549  
131.2804  
123.8054  
121.5593  
119.3124  
117.0669

70.7352  
70.7187  
65.5656  
63.7790  
63.5082  
63.2373  
62.9658  
60.3204  
60.2449  
39.6925  
39.6704  
33.4352  
33.2451  
33.1921  
32.9257  
20.1057  
20.0824  
16.9283  
16.9009

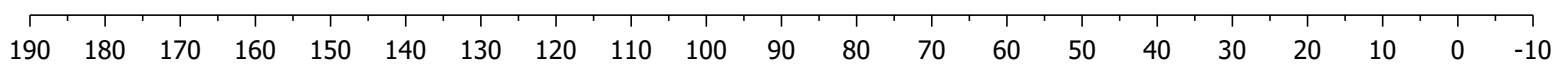

33.4352  
33.2451  
33.1921  
32.9257

20.1057  
20.0824

16.9283  
16.9009

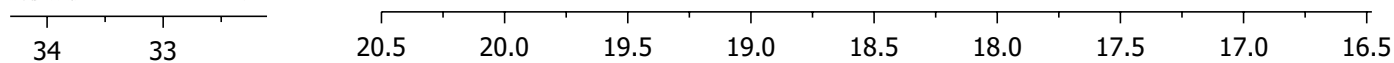

70.7352  
70.7187

63.7790  
63.5082  
63.2373  
62.9658

60.3204  
60.2449

39.6925  
39.6704

70.9 70.8 70.7 70.6

64 63 62 61 60

39.9 39.7 39.5

$^{19}\text{F}$  NMR (470 MHz) of **4** in  $\text{CDCl}_3$



—65.81

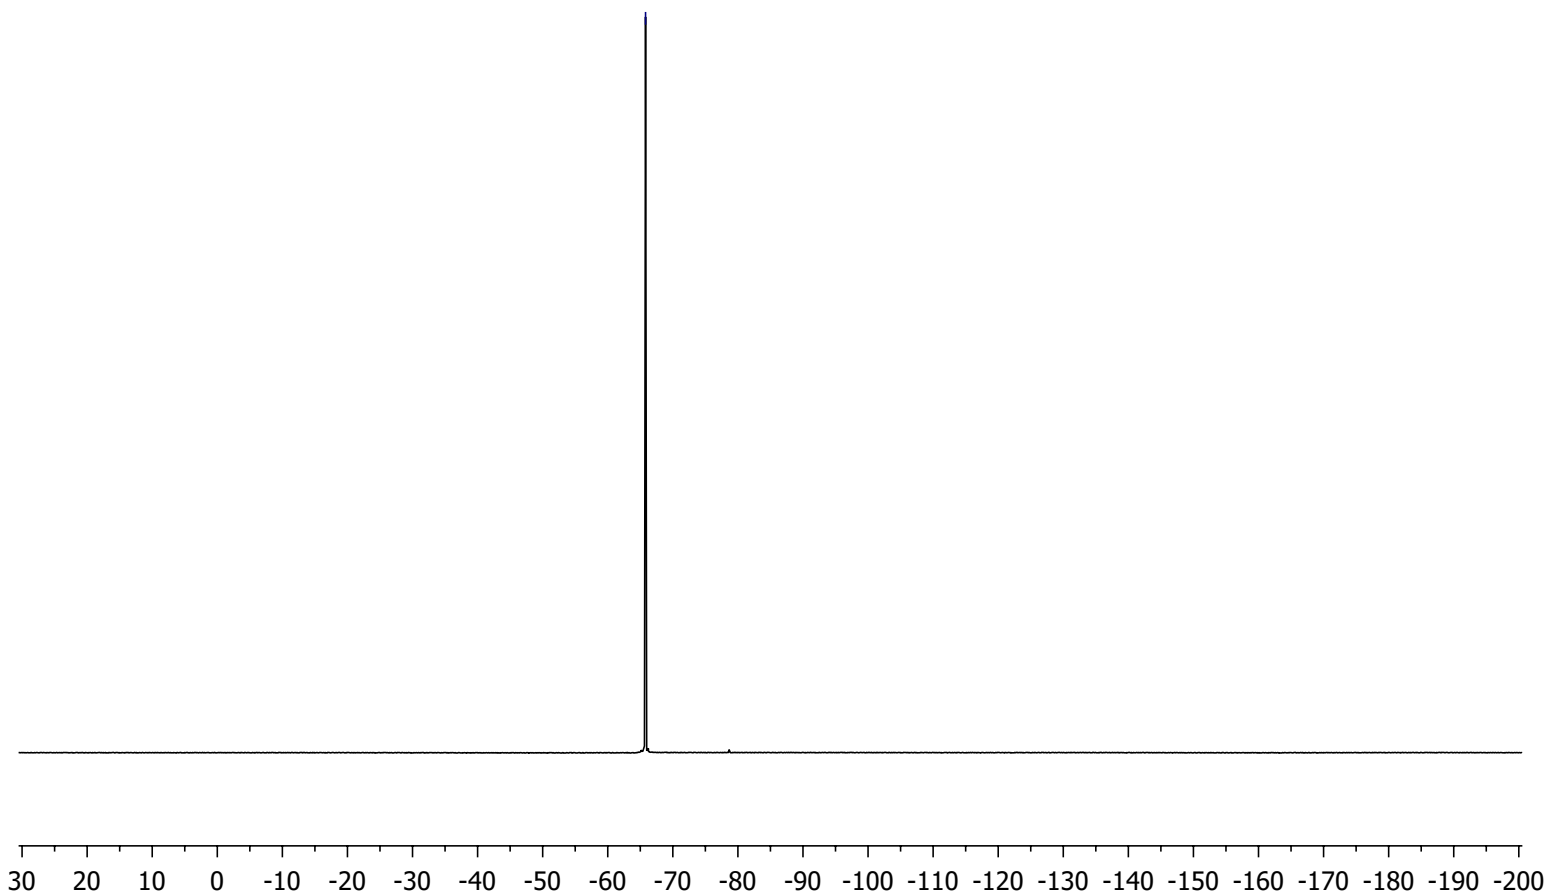

Supplement: c9cc08261a1.pdf [file c9cc08261a1.pdf]
